# Supplementary material for: Copper-catalyzed selective oxidation of hydrazones through C(sp3)–H functionalization
Source: Royal Society of Chemistry journal article supplement (doi:10.1039/d1ob01563j), 2021-01-01
Supplement: d1ob01563j1.pdf [file d1ob01563j1.pdf]

## **Copper(I)-catalyzed selective oxidation of hydrazones through C(sp<sup>3</sup>)-H functionalization**

Jiabin Shen,<sup>a,b</sup> Xiaoying Jiang,<sup>b,c</sup> Haifeng Wu,<sup>a,b</sup> Jun Xu,<sup>b</sup> Qing Zhu,<sup>\*a</sup> and Pengfei Zhang<sup>\*b</sup>

<sup>a</sup> Collaborative Innovation Center of Yangtze River Delta Region Green Pharmaceuticals,  
Zhejiang University of Technology, Hangzhou 310014, China.

<sup>b</sup> College of Material, Chemistry and Chemical Engineering, Key Laboratory of Organosilicon  
Chemistry and Material Technology, Ministry of Education, Hangzhou Normal University,  
Hangzhou, 311121, Zhejiang, People's Republic of China.

<sup>c</sup> College of Chemistry and Chemical Engineering, Central south University, Changsha, 410083,  
P.R. China

\*Email for Qing Zhu: zhuq@zjut.edu.cn

\*Email for Pengfei Zhang: pfzhang@hznu.edu.cn

## **Supporting Information**

### **Table of contents**

|                          |   |
|--------------------------|---|
| 1. Experimental Section  | 2 |
| 2. Copies of NMR Spectra | 5 |

## 1. Experimental Section

### 1.1 General procedure for the synthesis of **1**

A mixture of ketone (5.0 mmol, 1.0 equiv.), 4-aminomorpholine (5.5 mmol, 1.1 equiv.), acetic acid (5.5 mmol, 1.1 equiv.), and EtOH (15.0 mL) in a 25 mL flask was stirred at room temperature for 1 h. After completion of the reaction as indicated by TLC, purified water was added to the mixture to form the precipitate. The precipitate was washed with water and dried *in vacuo* to afford ketone hydrazone.

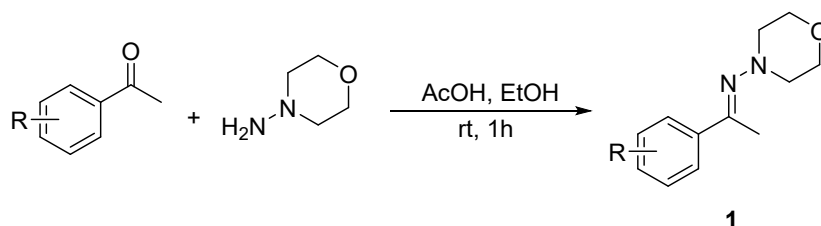

### 1.2 General procedure for oxidation of hydrazones

A mixture of **1** (0.2 mmol),  $K_2S_2O_8$  (2.0 equiv.), CuI (5 mol %), dry MeCN (2.0 mL) in a 25 mL tube was stirred at 70 °C for 1 h. Then, the mixture was diluted with EtOAc and filtered through a pad of Celite gradually. The solvent was removed under reduced pressure. The gathered residue was then purified by silica gel column chromatography (200–300 mesh silica gel, PE/EA = 3:1).

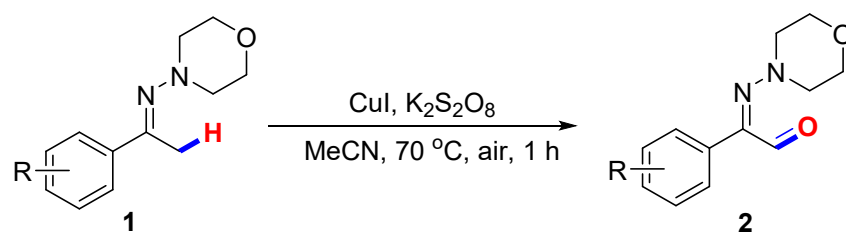

#### 1.2.1 other protecting group screening

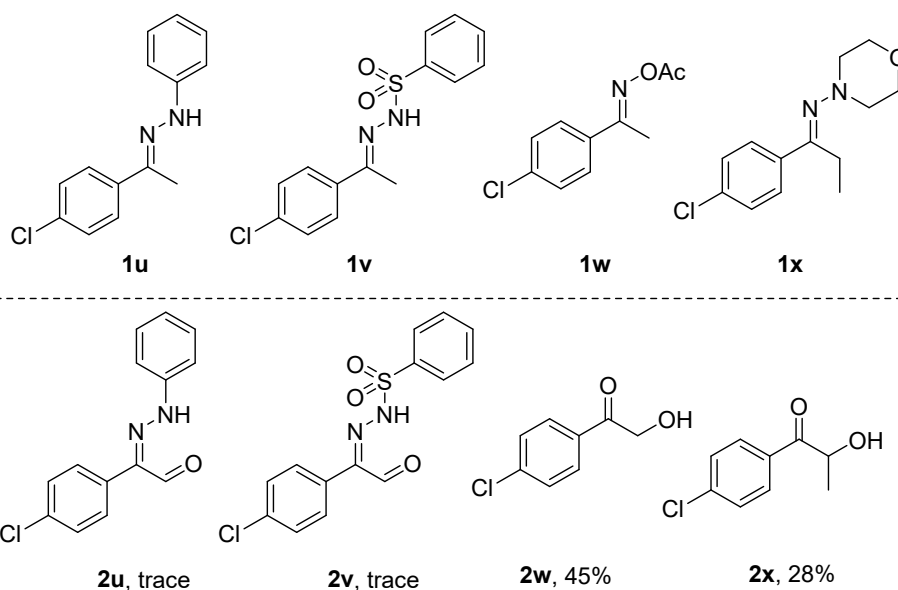

### 1.3 Gram-scale preparation

A mixture of **1** (10.0 mmol),  $K_2S_2O_8$  (2.0 equiv.), CuI (5 mol %), dry MeCN (25

mL) in a 100 mL tube was stirred at 70 °C for 2 h. Then, the mixture was diluted with EtOAc and filtered through a pad of Celite gradually. The solvent was removed under reduced pressure. The gathered residue was then purified by silica gel column chromatography (200–300 mesh silica gel, PE/EA = 3:1)

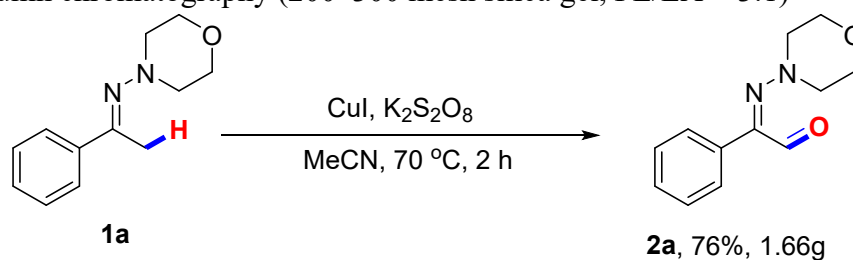

#### 1.4 General procedure for the synthesis of 3a

A mixture of **2a** (0.2 mmol),  $\text{NH}_2\text{OH}\cdot\text{HCl}$  (2.0 equiv.), dry MeCN (2.0 mL) in a 25 mL tube was stirred at 70 °C for 2 h. After completion of the reaction as indicated by TLC, the mixture was diluted with EtOAc and filtered through a pad of Celite gradually. The solvent was removed under reduced pressure. The gathered residue was then purified by silica gel column chromatography (200–300 mesh silica gel, PE/EA = 4:1).

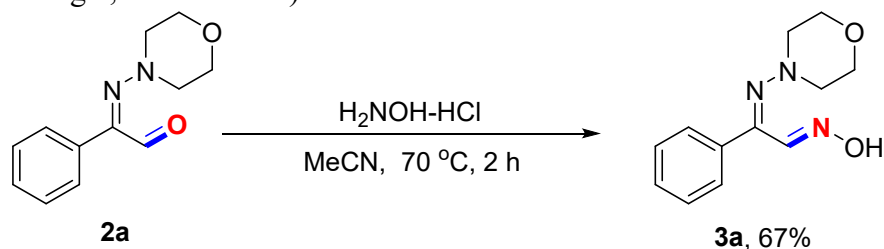

#### 1.5 General procedure for the synthesis of 3b

A mixture of **2a** (0.2 mmol),  $\text{K}_2\text{CO}_3$  (2.0 equiv.), MeCN/ $\text{H}_2\text{O}$  (1:1, 2.0 mL) in a 25 mL tube was stirred at room temperature for 2 h. After completion of the reaction as indicated by TLC, the mixture was diluted with EtOAc and filtered through a pad of Celite gradually. The solvent was removed under reduced pressure. The gathered residue was then purified by silica gel column chromatography (200–300 mesh silica gel, PE/EA = 2:1).

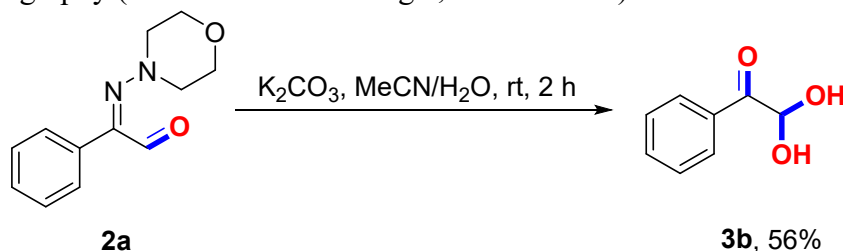

#### 1.6 Control Experiments

(a) A mixture of acetophenone (0.2 mmol),  $\text{K}_2\text{S}_2\text{O}_8$  (2.0 equiv.), CuI (5 mol %), dry MeCN (2.0 mL) in a 25 mL tube was stirred at 70 °C for 1 h. Only a trace amount of the product was detected.

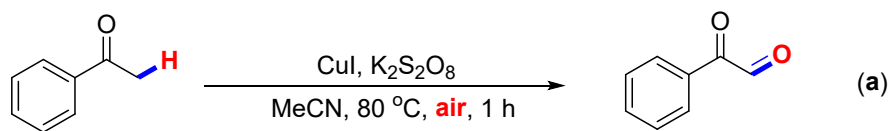

**3c**, trace

(b) A mixture of **1** (0.2 mmol),  $\text{K}_2\text{S}_2\text{O}_8$  (2.0 equiv.),  $\text{CuI}$  (5 mol %), TEMPO (1.0 or 2.0 equiv.) dry MeCN (2.0 mL) in a 25 mL tube was stirred at 70 °C for 1 h. Then, the mixture was diluted with EtOAc and filtered through a pad of Celite gradually. The solvent was removed under reduced pressure. The gathered residue was then purified by silica gel column chromatography (200–300 mesh silica gel, PE/EA = 3:1).

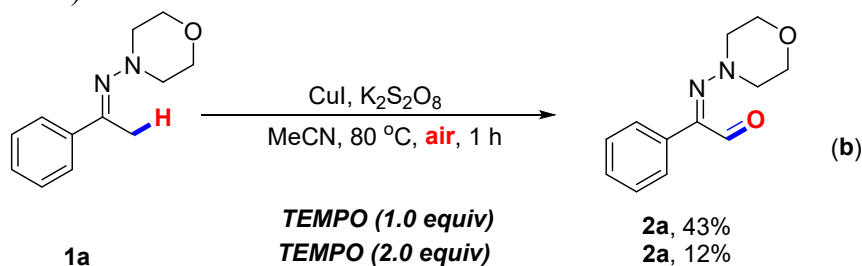

(c) A mixture of **1** (0.2 mmol),  $\text{K}_2\text{S}_2\text{O}_8$  (2.0 equiv.),  $\text{CuI}$  (5 mol %), dry MeCN (2.0 mL) in a 25 mL tube was stirred at 70 °C for 1 h under  $^{18}\text{O}_2$  atmosphere. Then, the mixture was diluted with EtOAc and filtered through a pad of Celite gradually. The solvent was removed under reduced pressure. The gathered residue was then purified by silica gel column chromatography (200–300 mesh silica gel, PE/EA = 3:1).

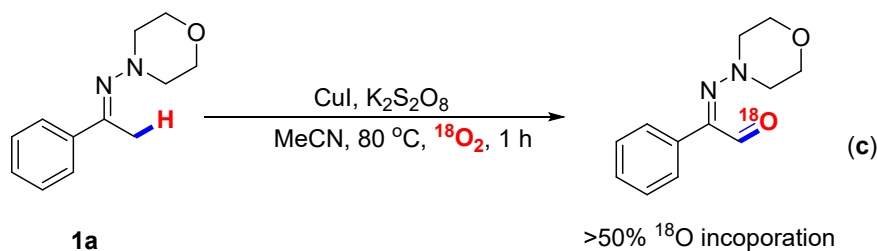

# 1. Copies of NMR Spectra

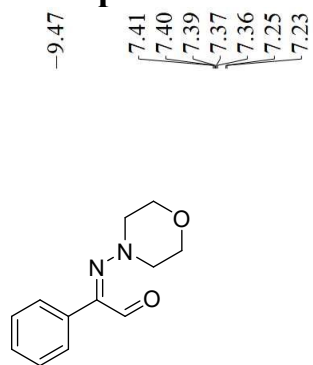

3.68  
3.67  
3.66  
3.30  
3.29  
3.28

9.47  
7.41  
7.40  
7.39  
7.37  
7.36  
7.25  
7.23

2a <sup>1</sup>H NMR (500 MHz, CDCl<sub>3</sub>)

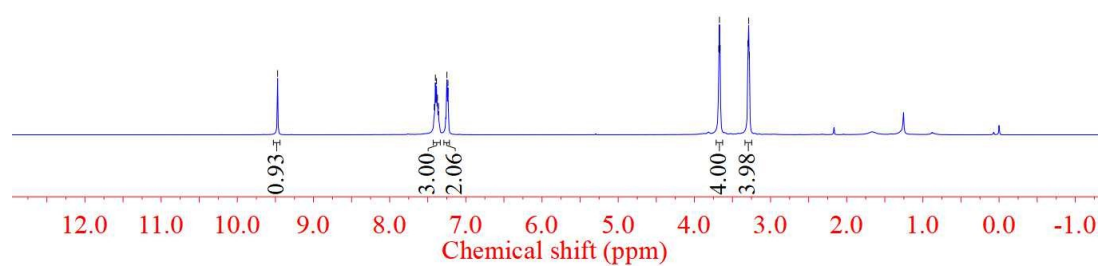

191.70

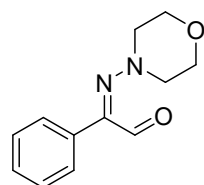

77.29  
77.04  
76.79  
66.15  
54.59

143.15  
132.84  
128.92  
128.79  
128.52

2a <sup>13</sup>C NMR (126 MHz, CDCl<sub>3</sub>)

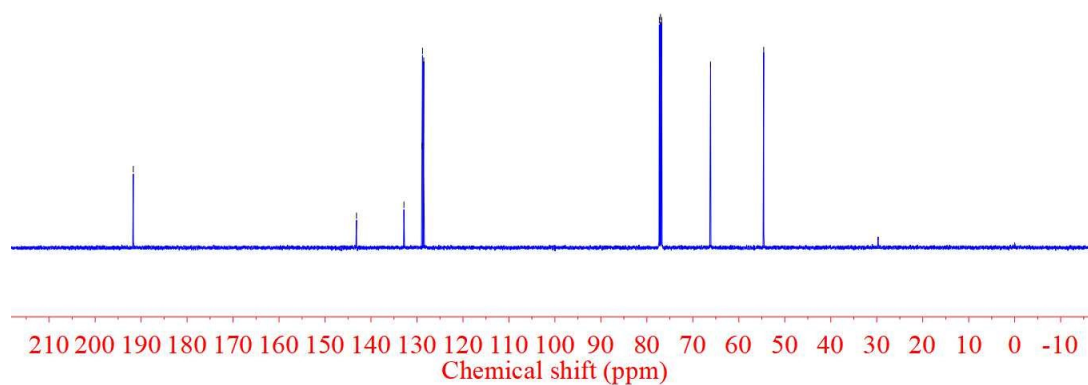

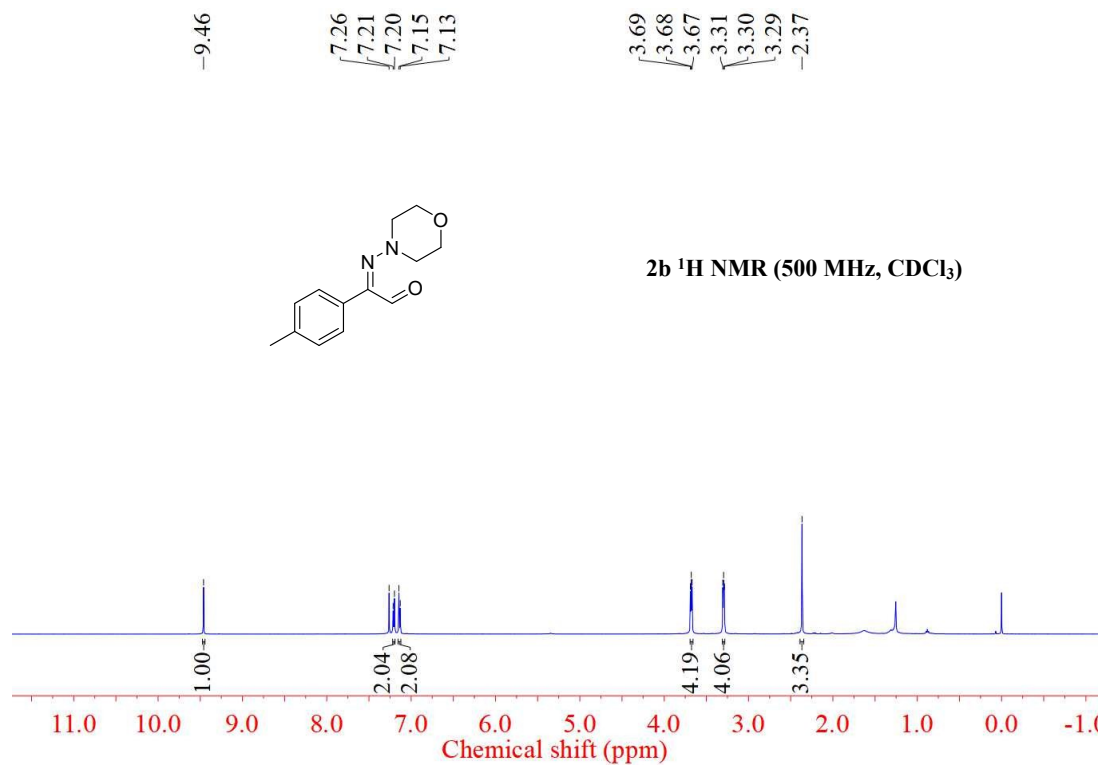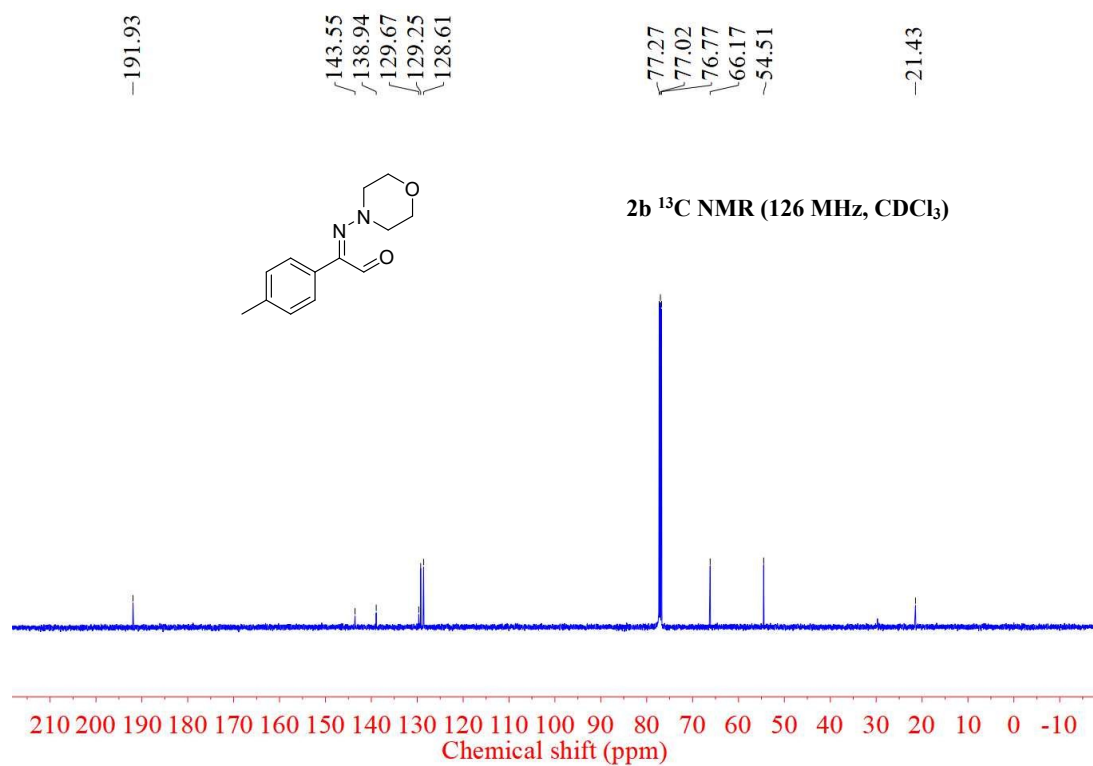

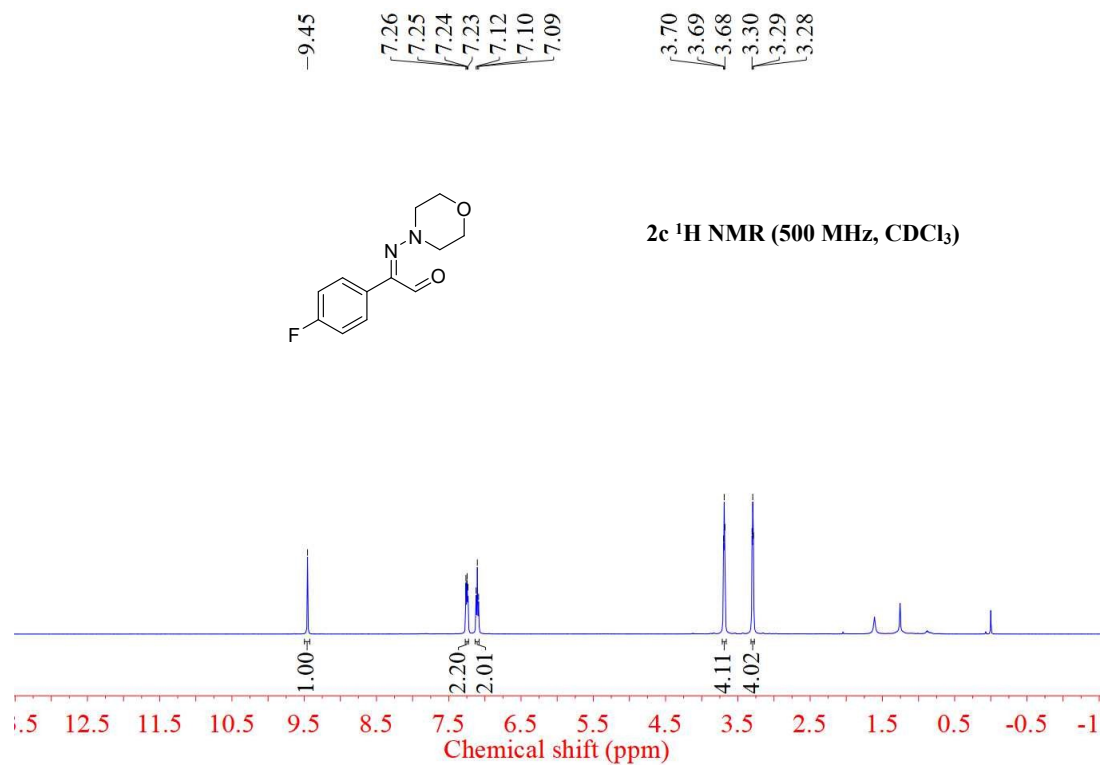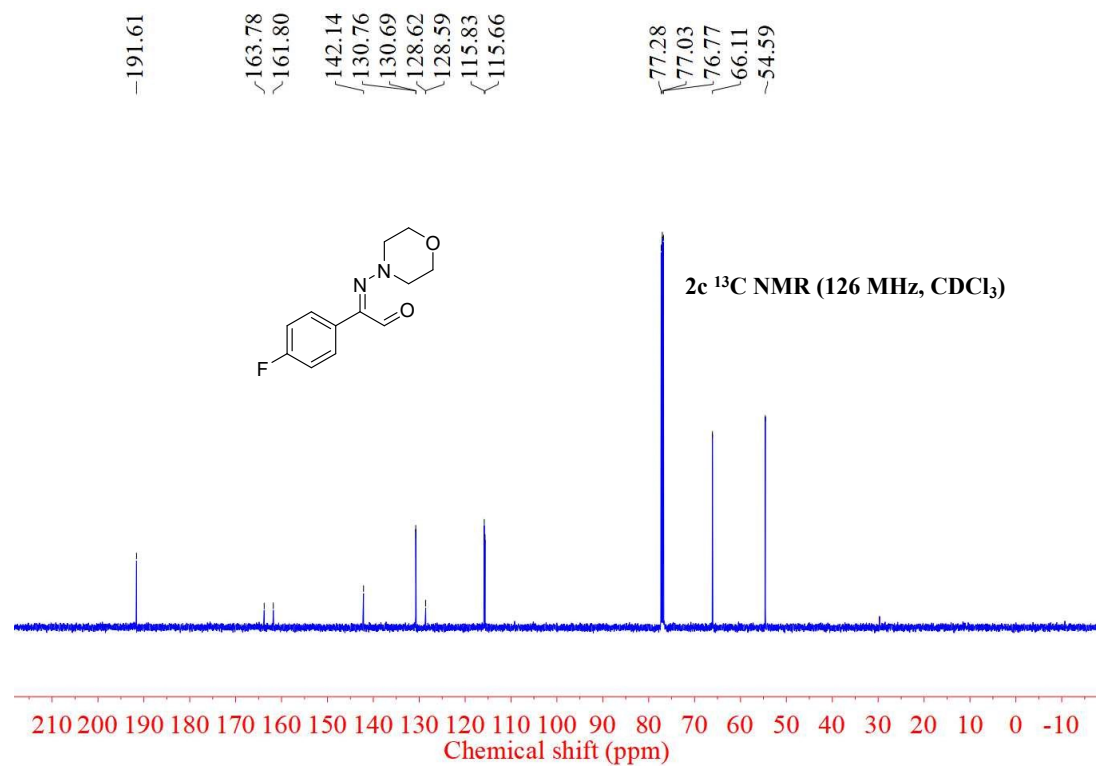

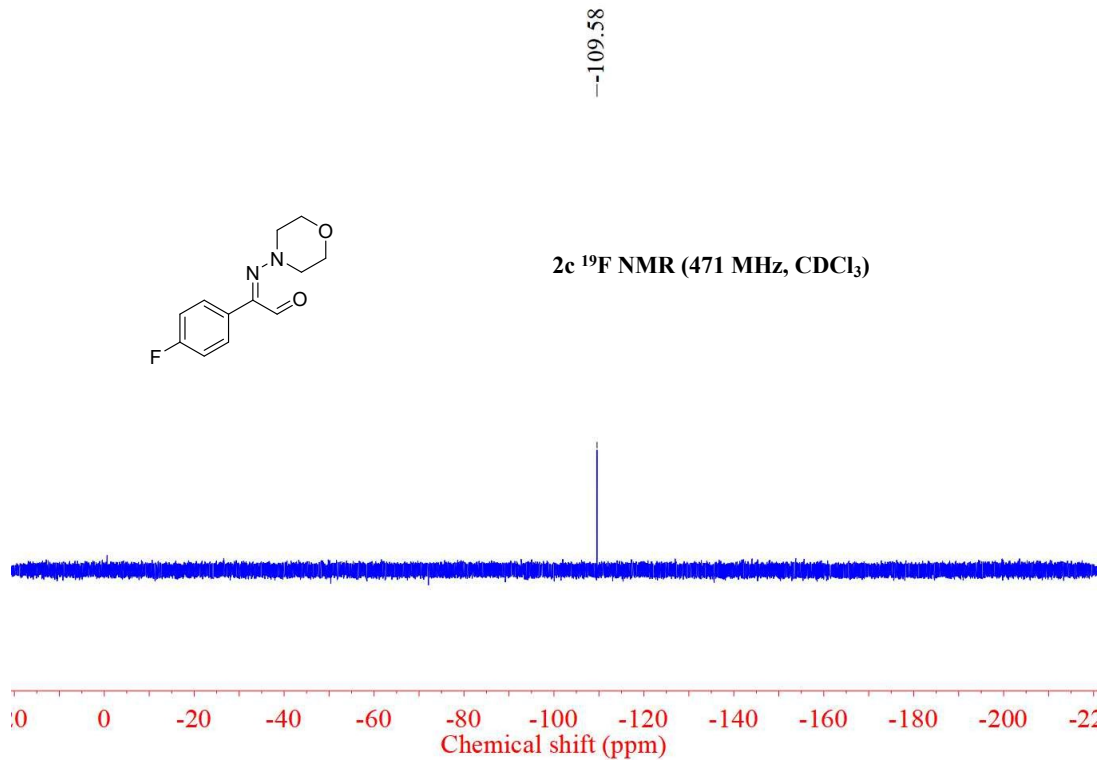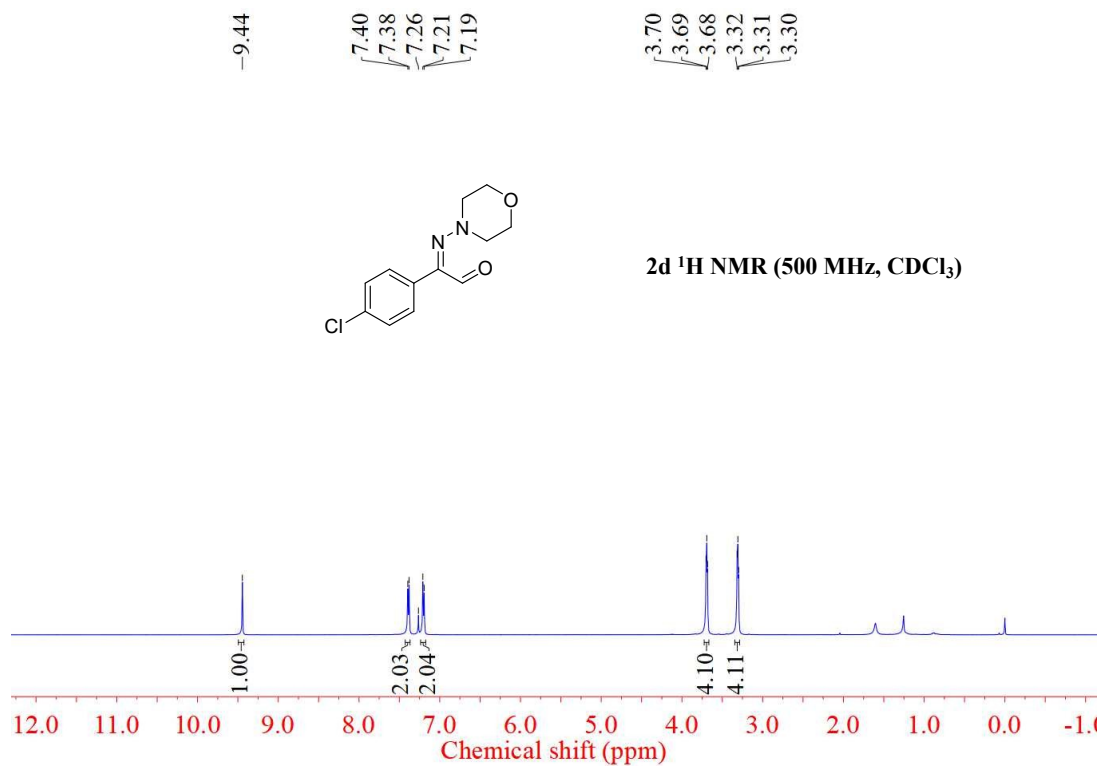



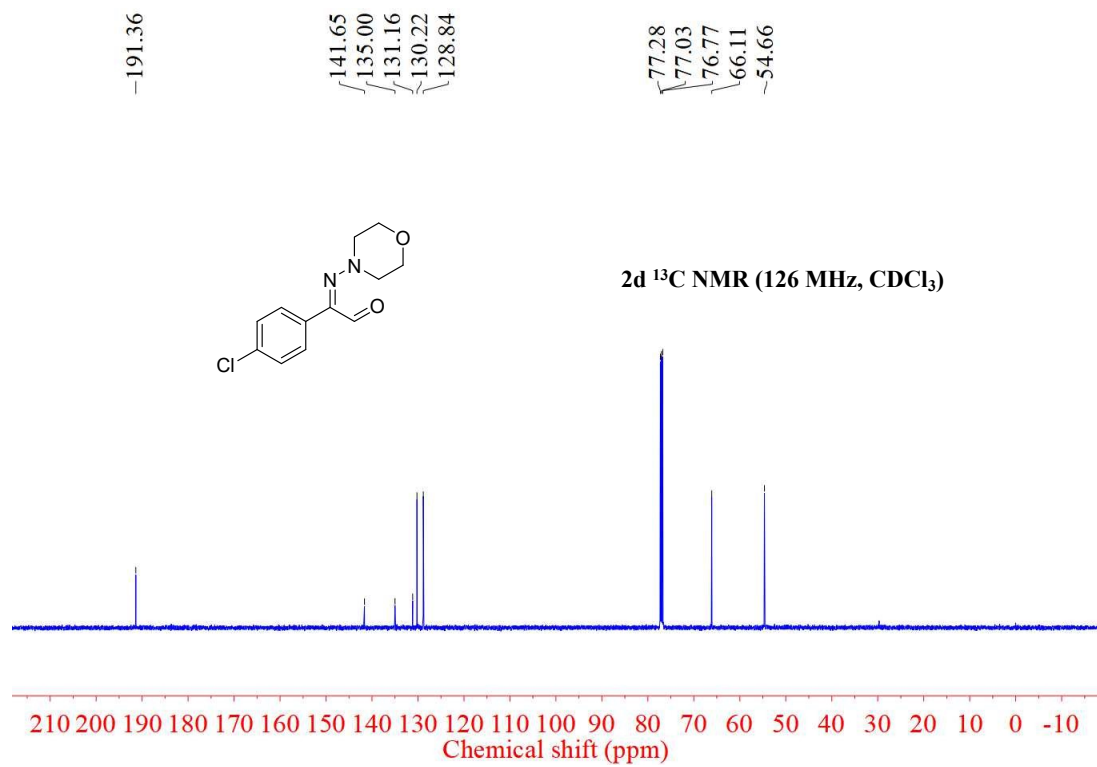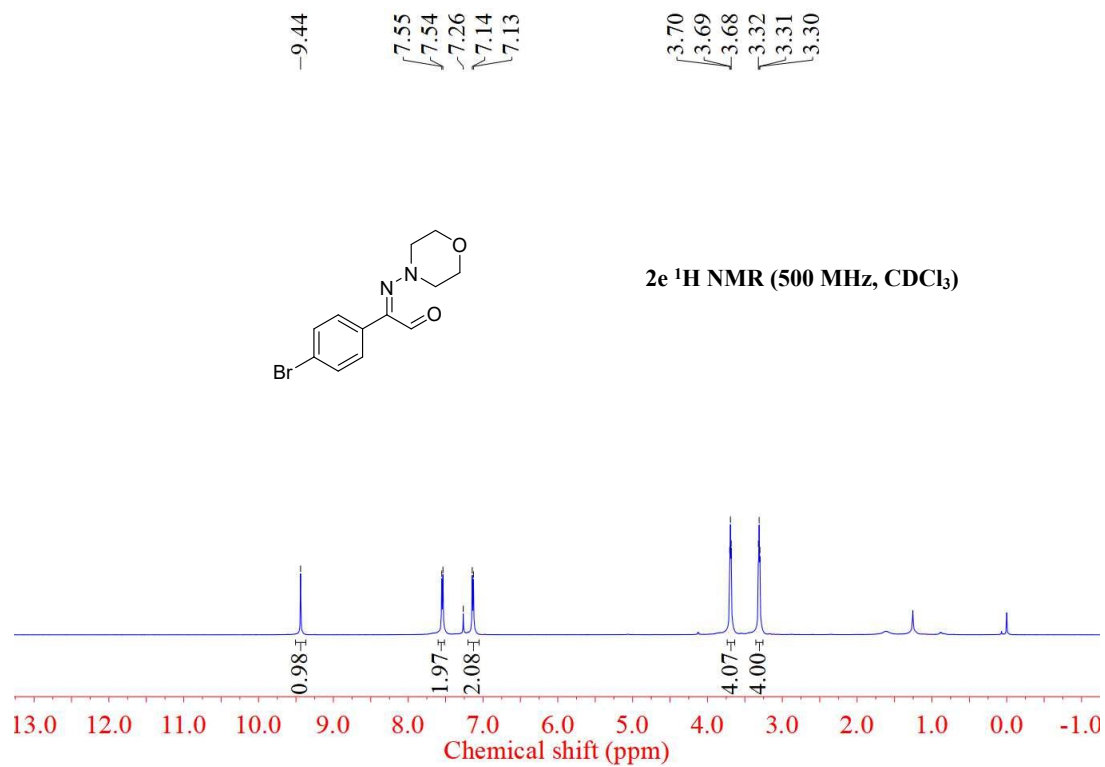

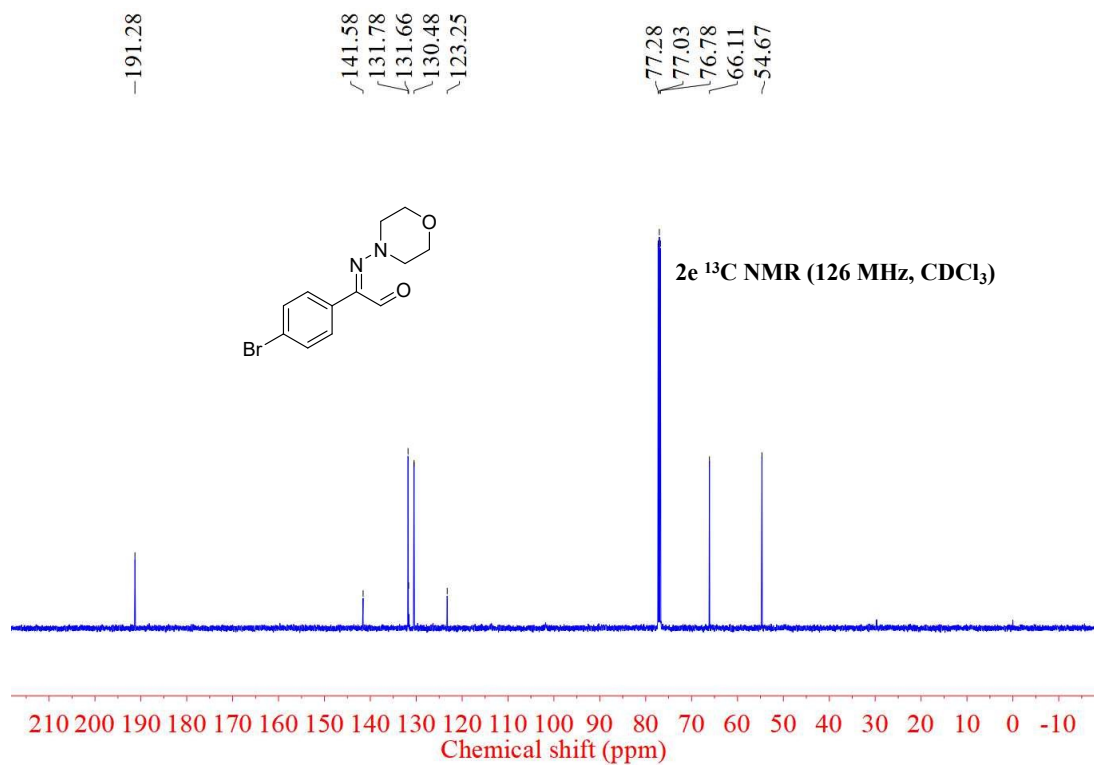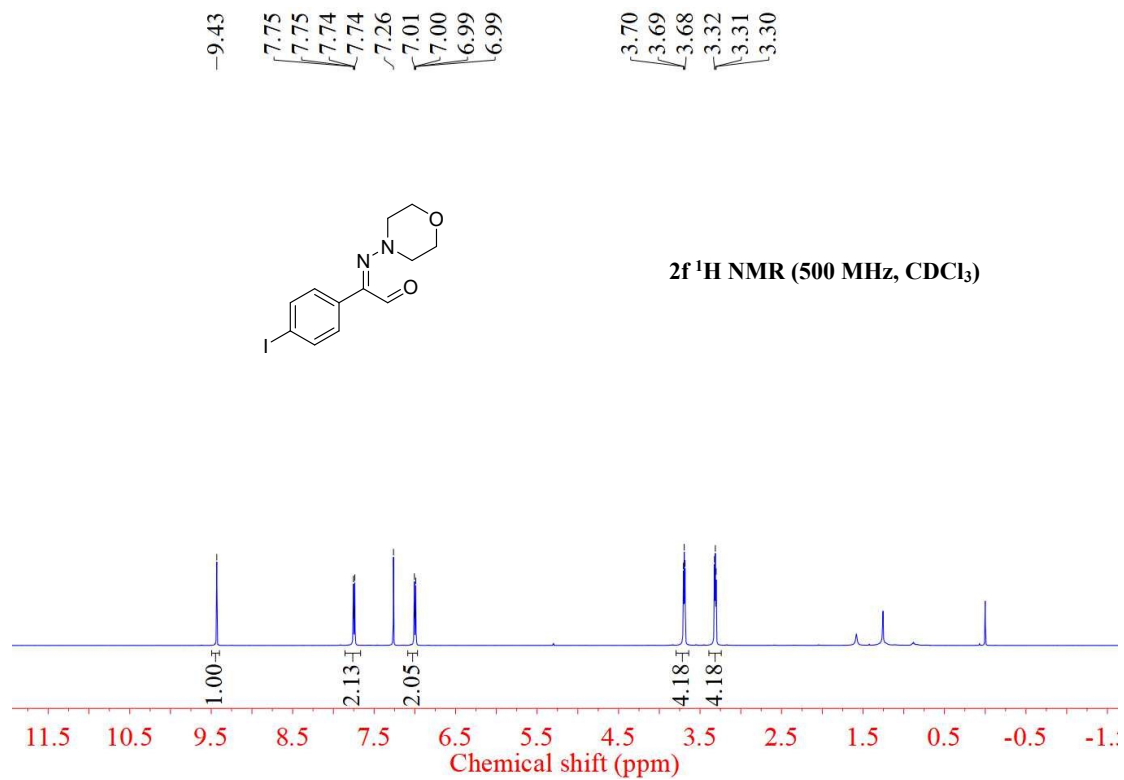

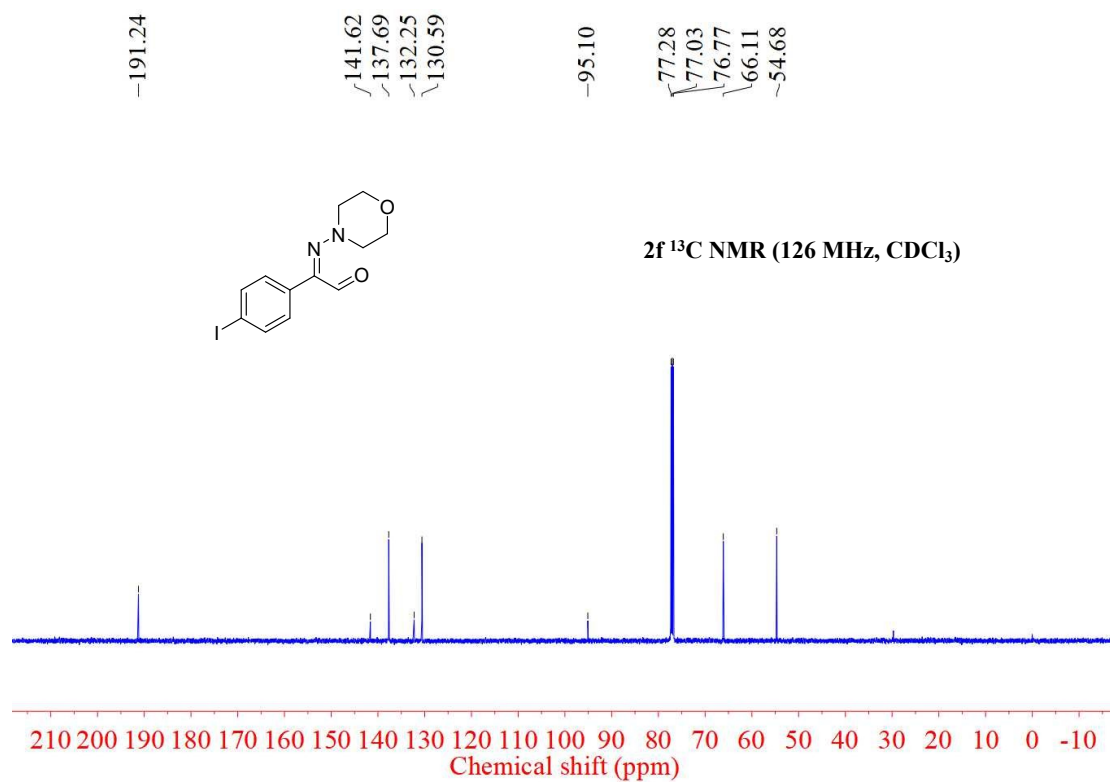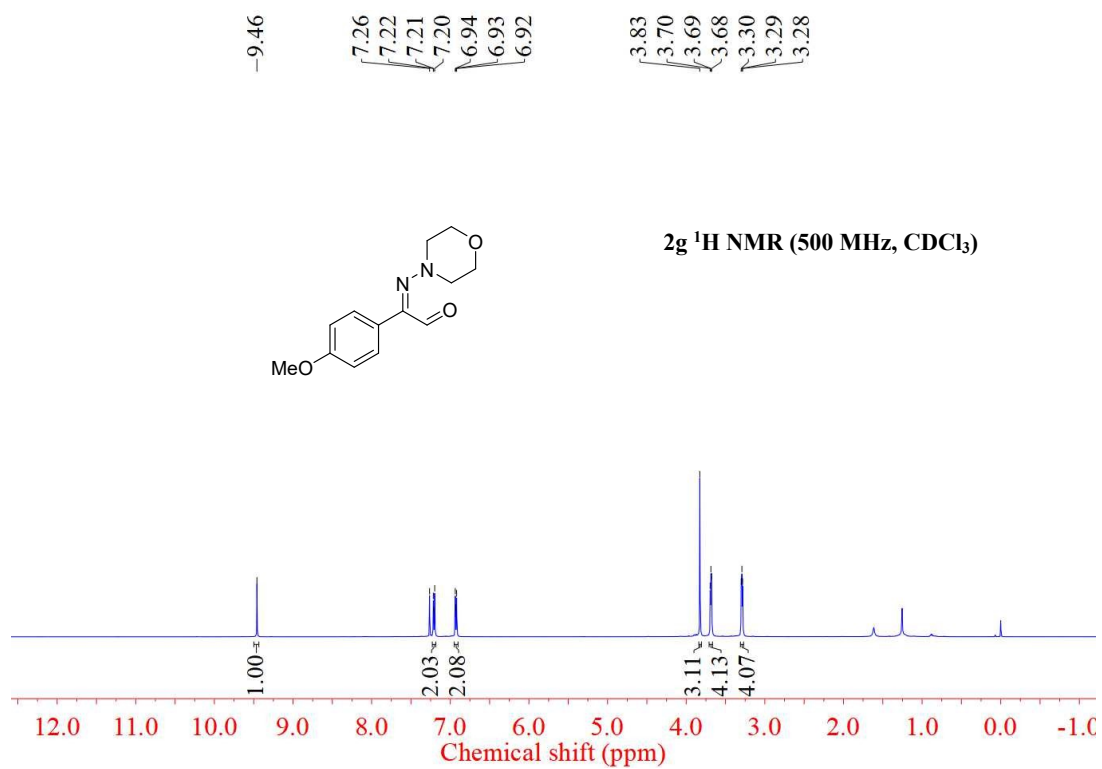

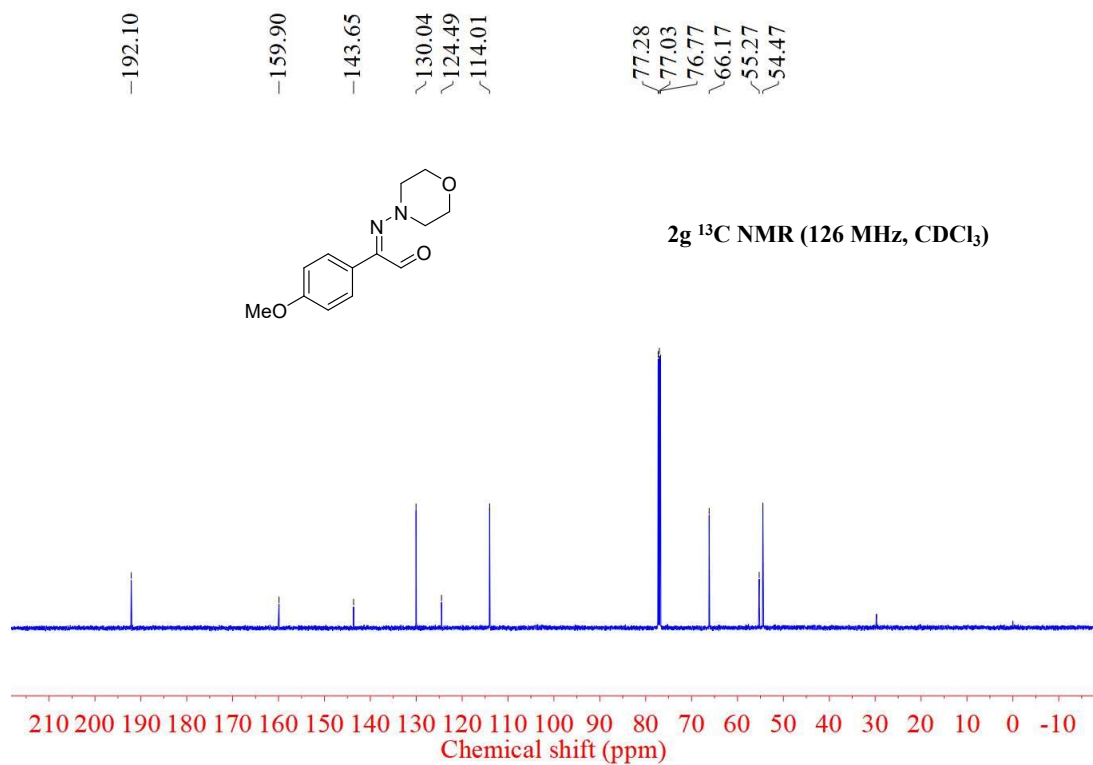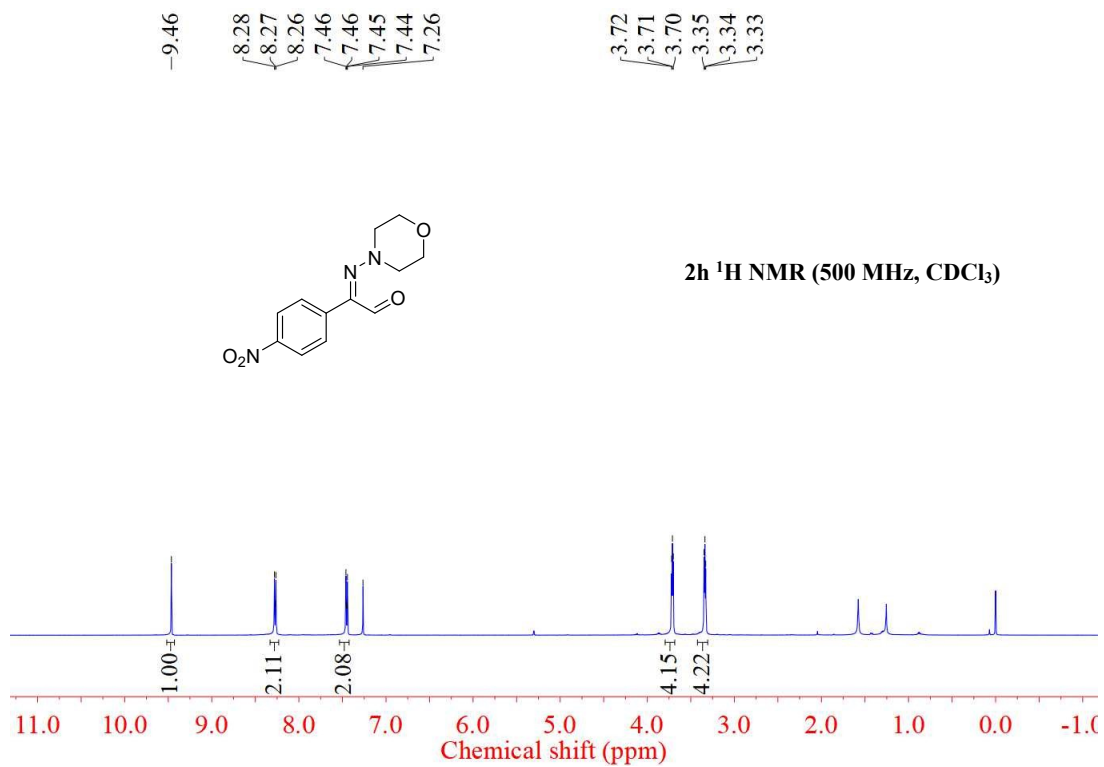

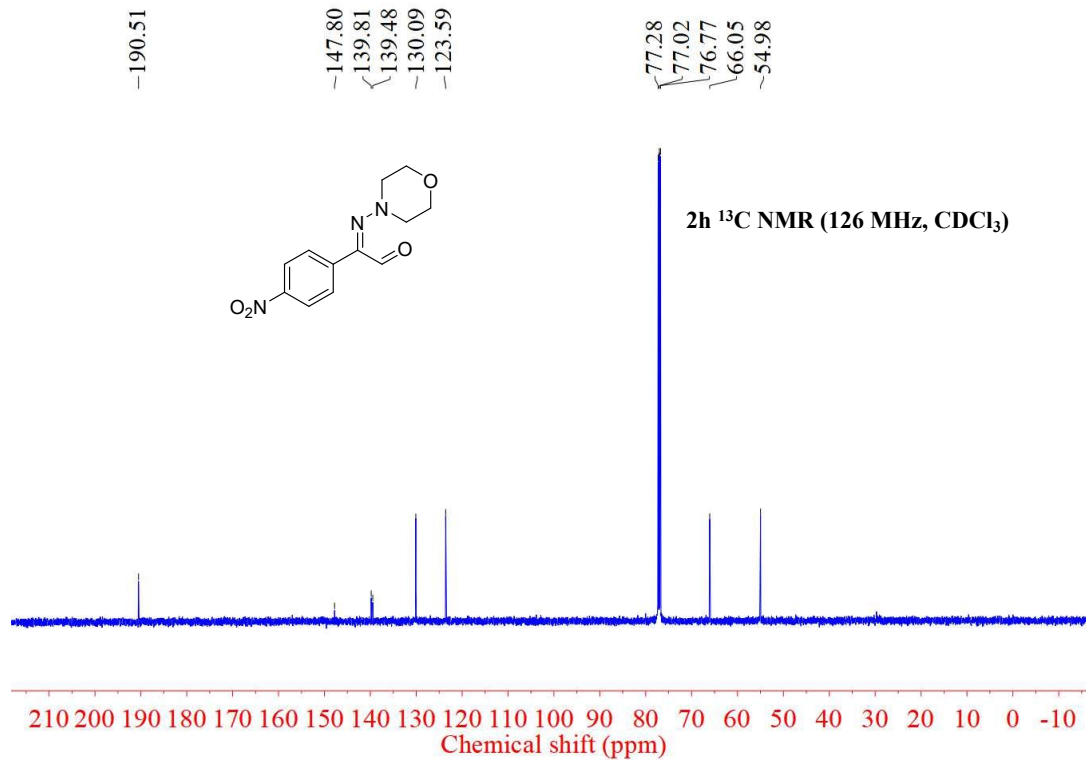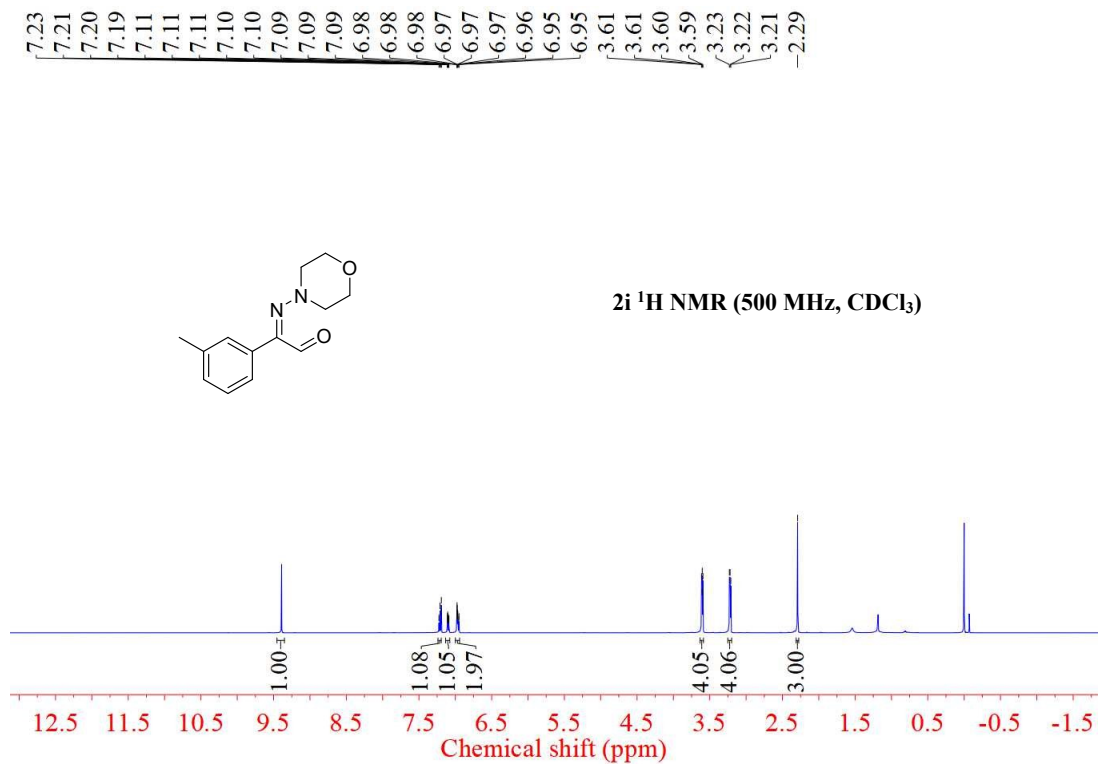

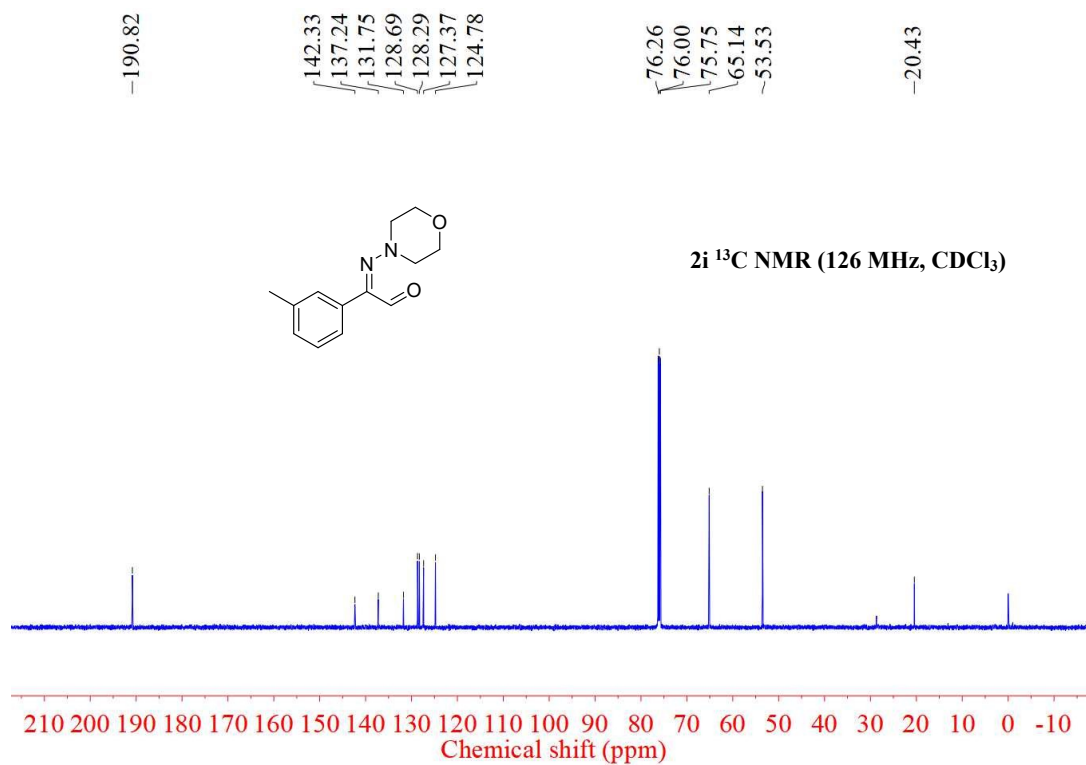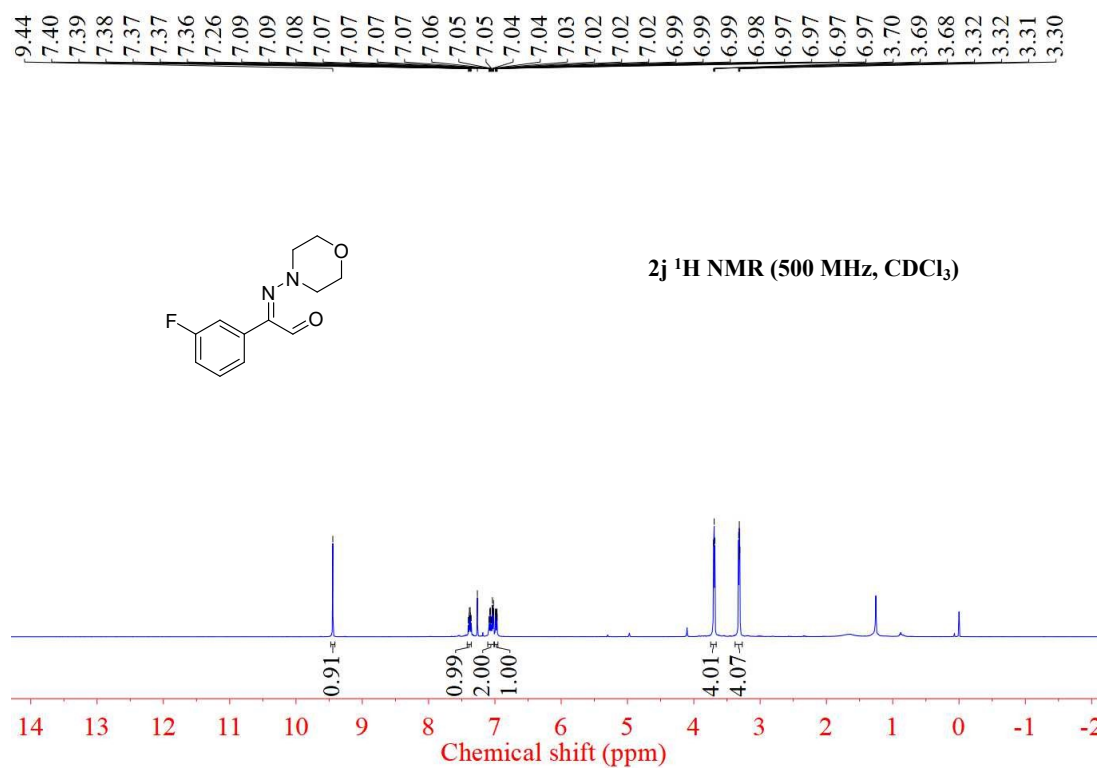

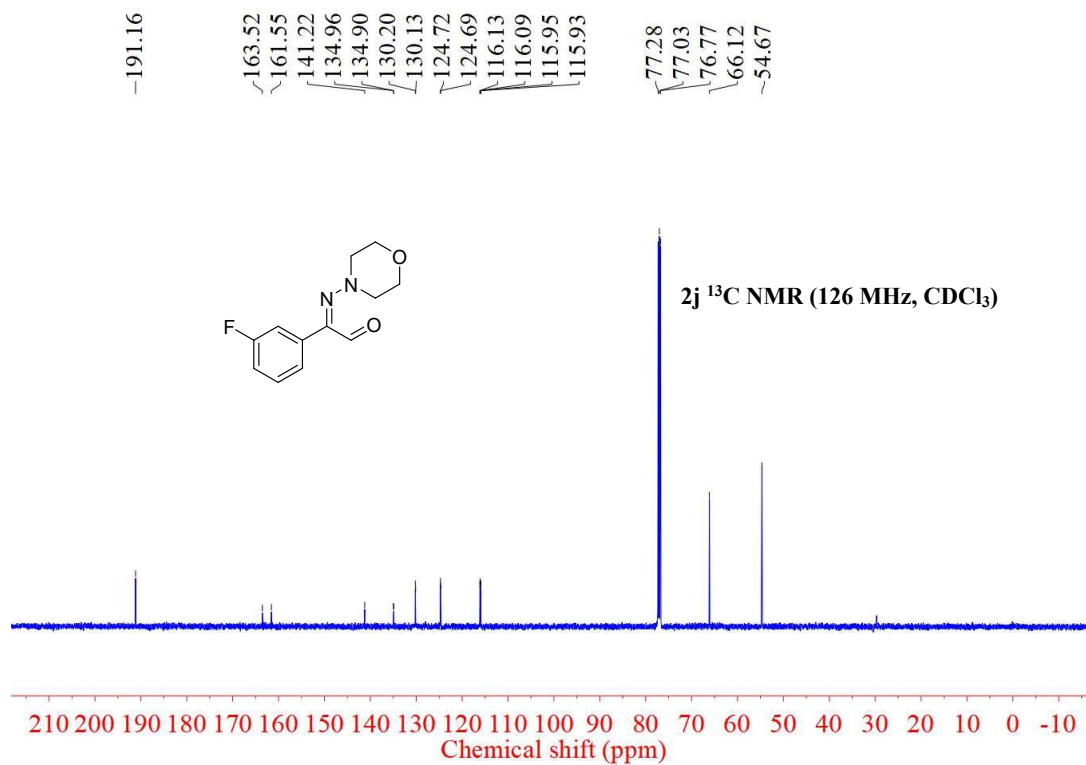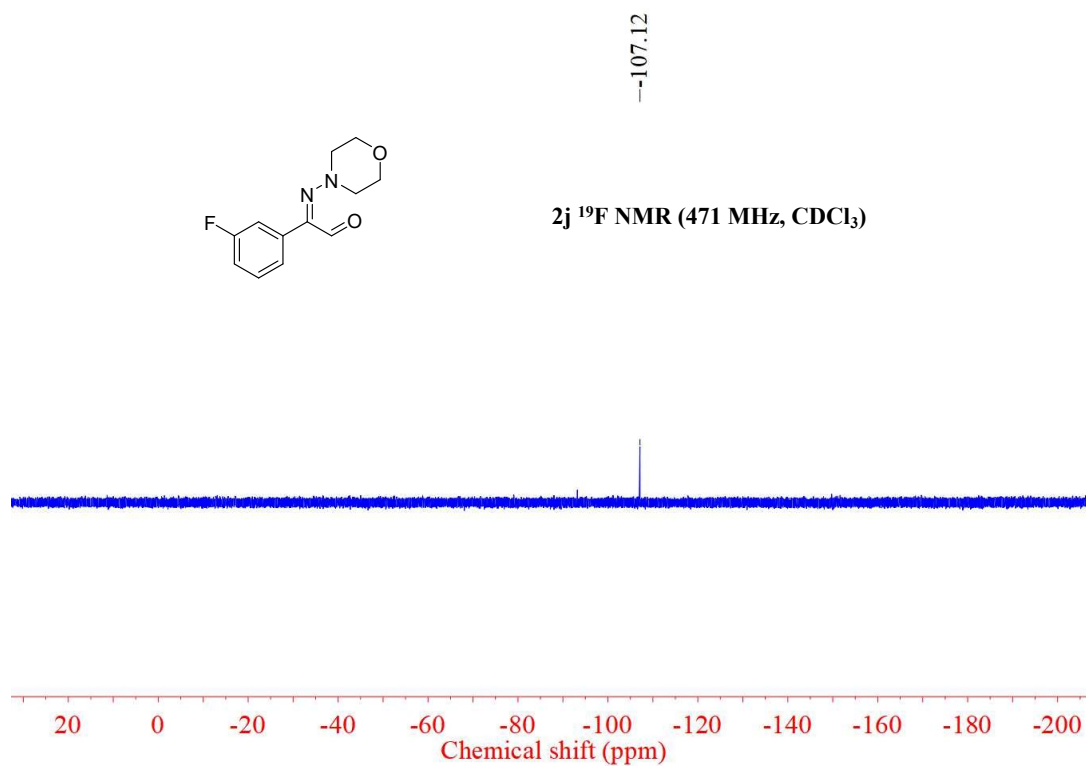

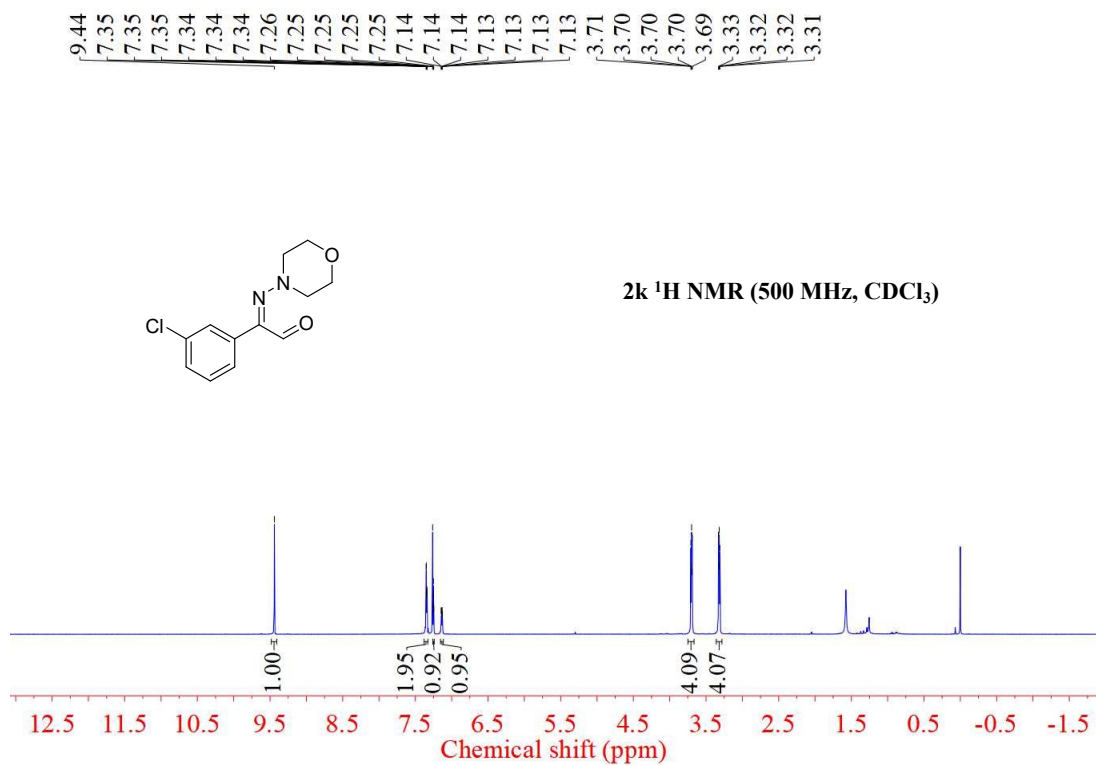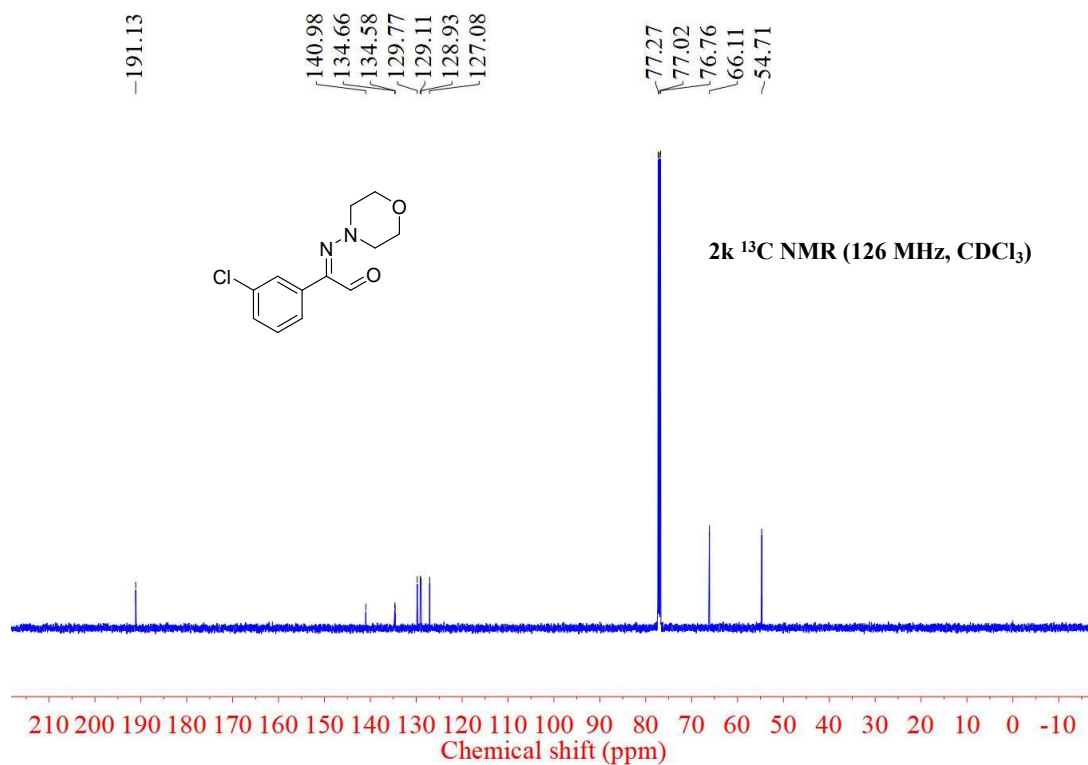



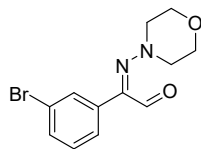

21 <sup>1</sup>H NMR (500 MHz, CDCl<sub>3</sub>)

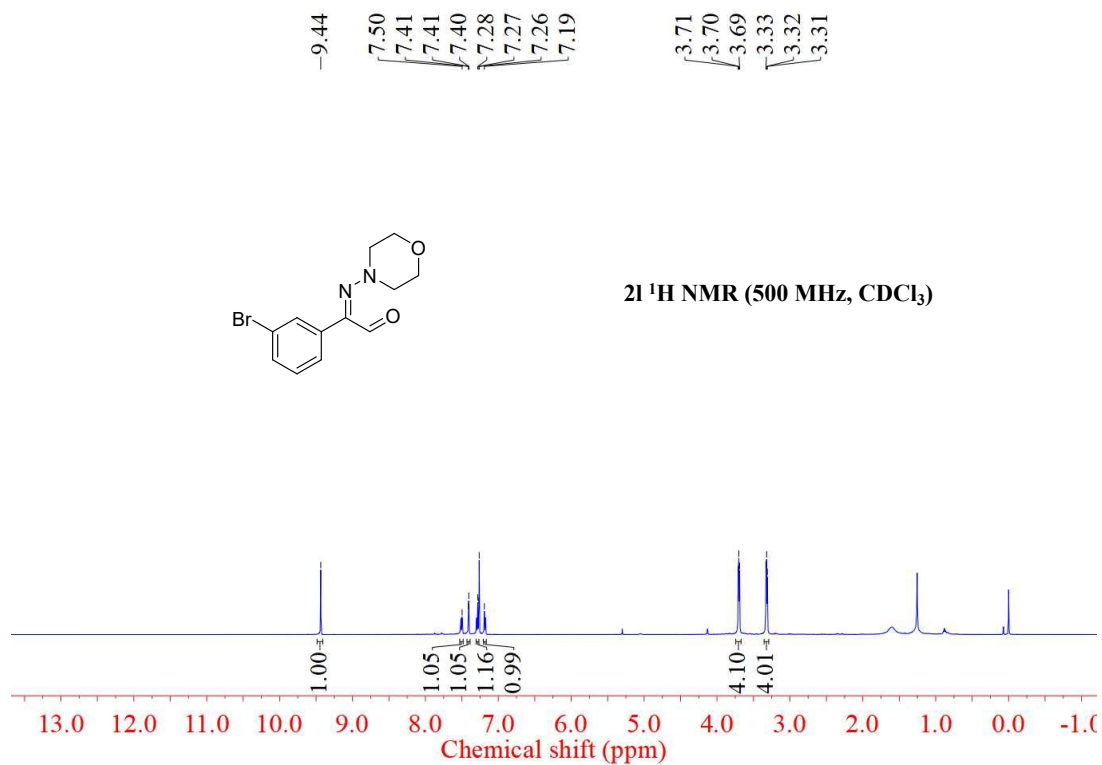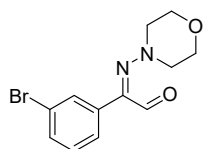

21 <sup>13</sup>C NMR (126 MHz, CDCl<sub>3</sub>)

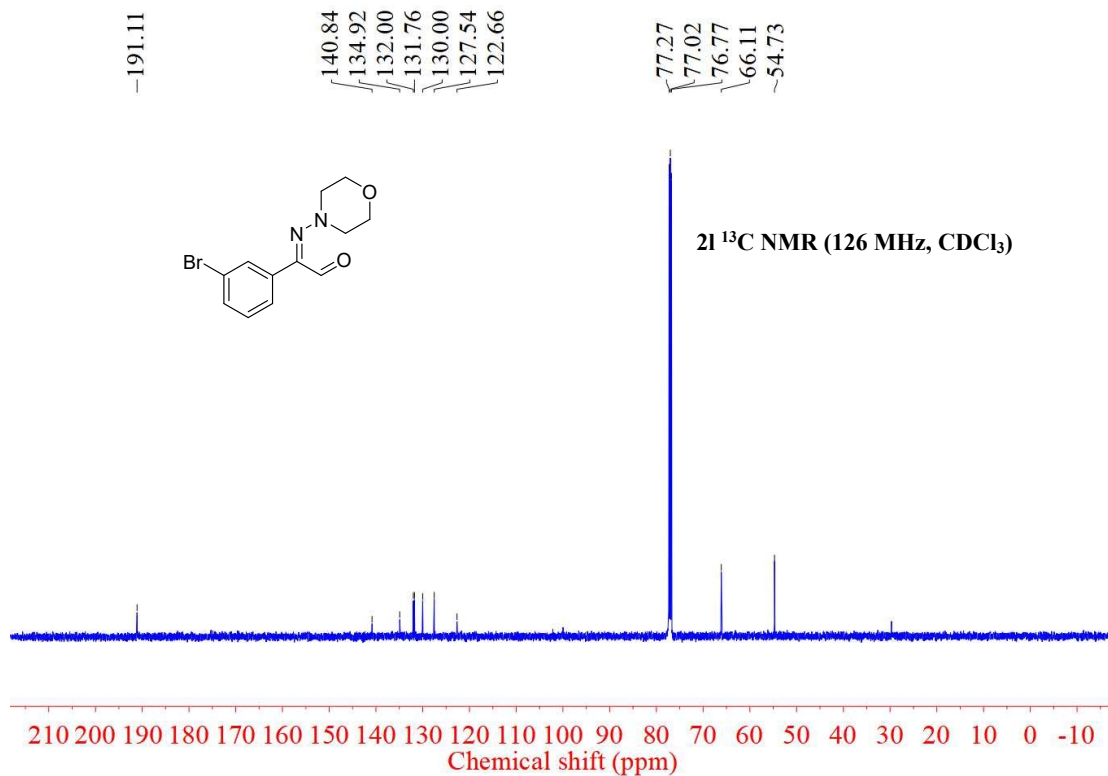

9.47  
8.25  
8.24  
8.24  
8.24  
8.23  
8.23  
8.14  
8.13  
8.13  
8.13  
7.62  
7.61  
7.61  
7.61  
7.60  
7.27  
3.72  
3.71  
3.70  
3.35  
3.35  
3.34  
3.33

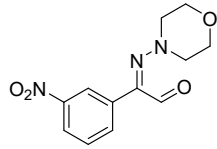

2m <sup>1</sup>H NMR (500 MHz, CDCl<sub>3</sub>)

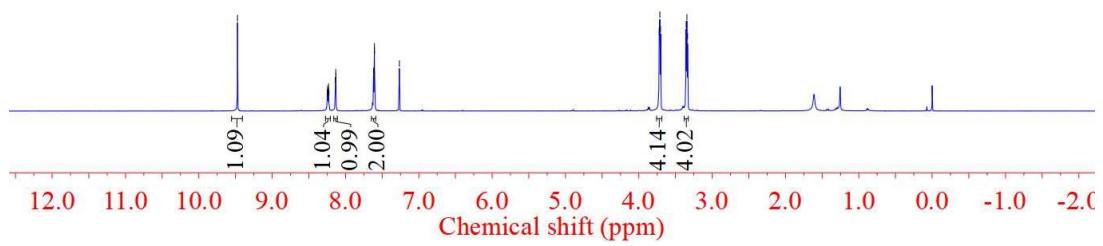

-190.70  
148.10  
139.19  
135.03  
134.55  
129.51  
123.94  
123.71  
77.28  
77.03  
76.78  
66.04  
54.90

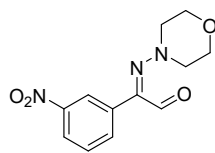

2m <sup>13</sup>C NMR (126 MHz, CDCl<sub>3</sub>)

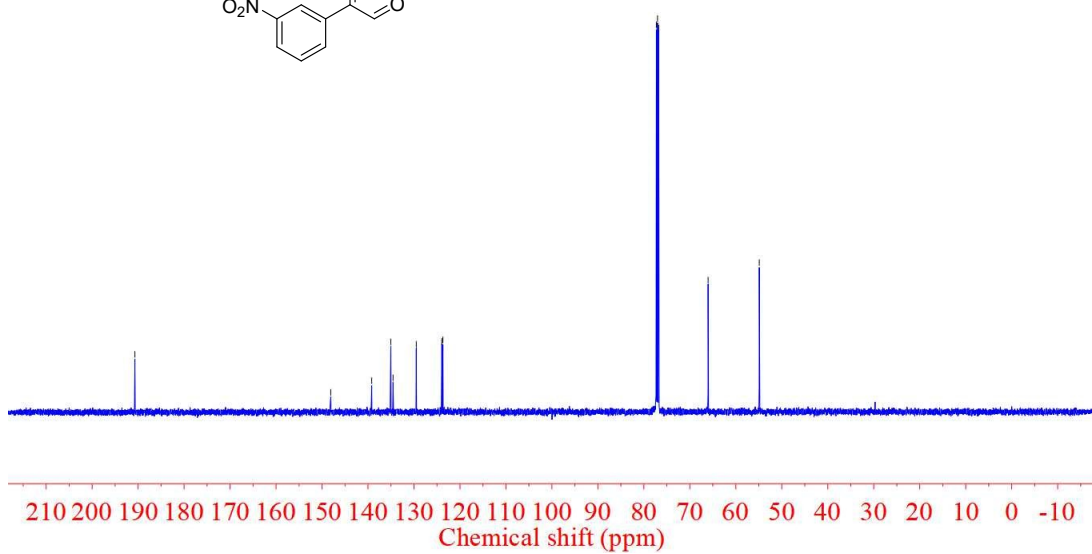

9.48  
7.28  
7.28  
7.27  
7.26  
7.22  
7.22  
7.21  
7.20  
7.08  
7.08  
7.07  
7.06  
3.67  
3.66  
3.65  
3.27  
3.27  
3.26  
3.26  
3.25  
-2.15

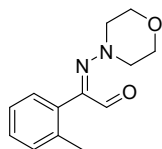

2n <sup>1</sup>H NMR (500 MHz, CDCl<sub>3</sub>)

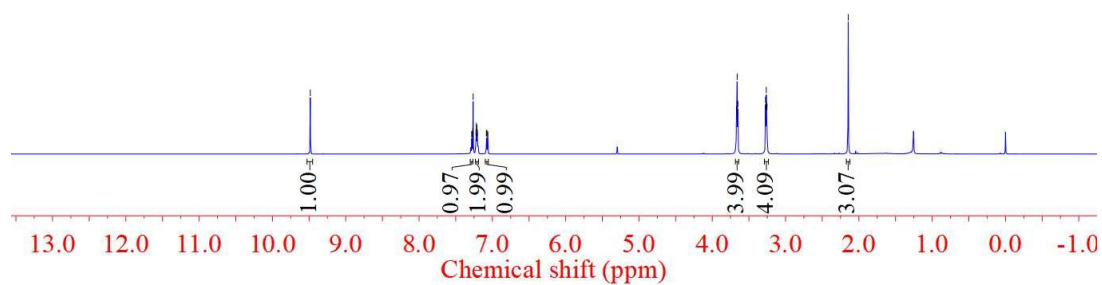

-191.78  
142.96  
136.78  
132.97  
130.03  
129.18  
129.07  
125.91  
77.28  
77.03  
76.78  
66.42  
-54.11  
-19.70

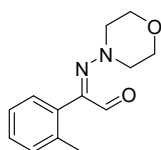

2n <sup>13</sup>C NMR (126 MHz, CDCl<sub>3</sub>)

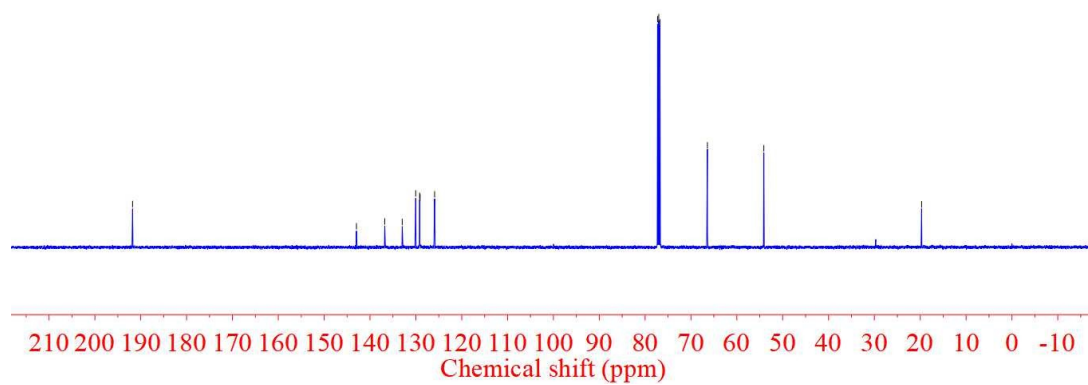

9.46  
7.39  
7.39  
7.39  
7.38  
7.37  
7.26  
7.21  
7.21  
7.20  
7.19  
7.12  
7.10  
7.08  
3.72  
3.71  
3.70  
3.40  
3.39  
3.38

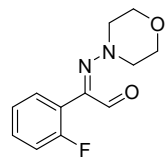

2o <sup>1</sup>H NMR (500 MHz, CDCl<sub>3</sub>)

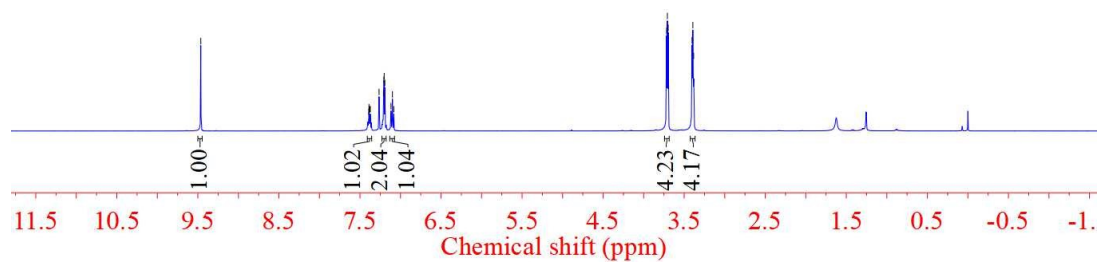

190.94  
160.67  
160.61  
158.69  
158.65  
135.61  
135.57  
131.07  
124.29  
121.07  
120.91  
115.79  
115.60  
66.33  
66.30  
54.03  
53.99

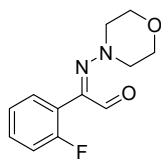

2o <sup>13</sup>C NMR (126 MHz, CDCl<sub>3</sub>)

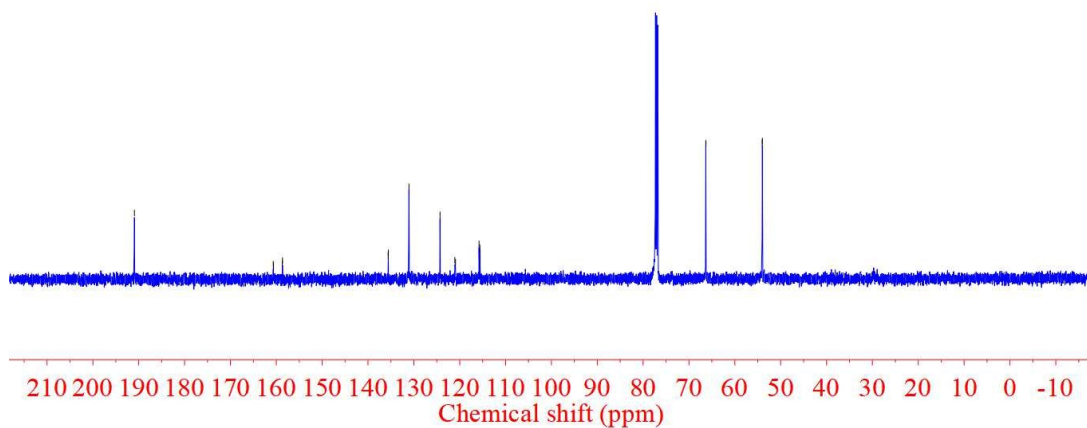

-111.27

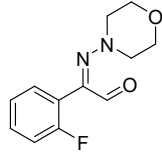

2o <sup>19</sup>F NMR (471 MHz, CDCl<sub>3</sub>)

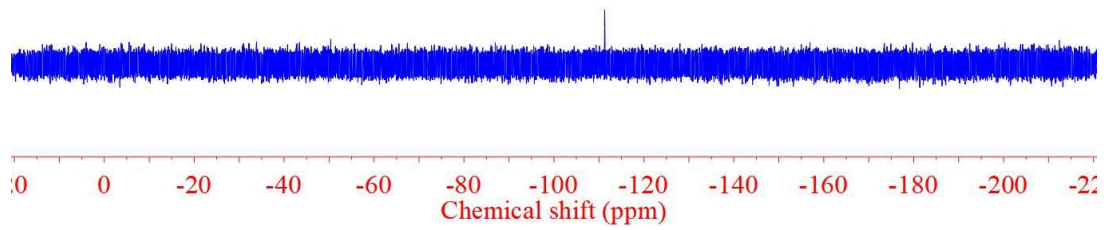

9.45  
7.43  
7.41  
7.34  
7.33  
7.32  
7.31  
7.26  
7.19  
7.18  
7.18  
3.72  
3.71  
3.70  
3.69  
3.39  
3.38  
3.37  
3.35  
3.34  
3.33

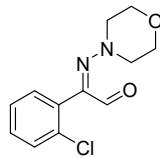

2p <sup>1</sup>H NMR (500 MHz, CDCl<sub>3</sub>)

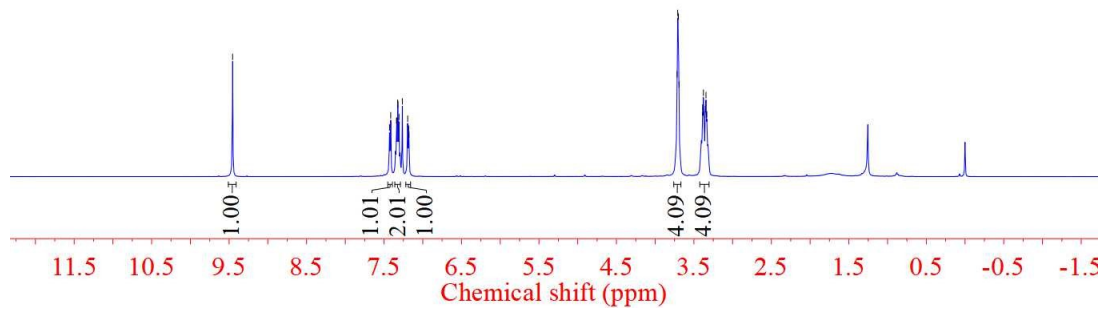

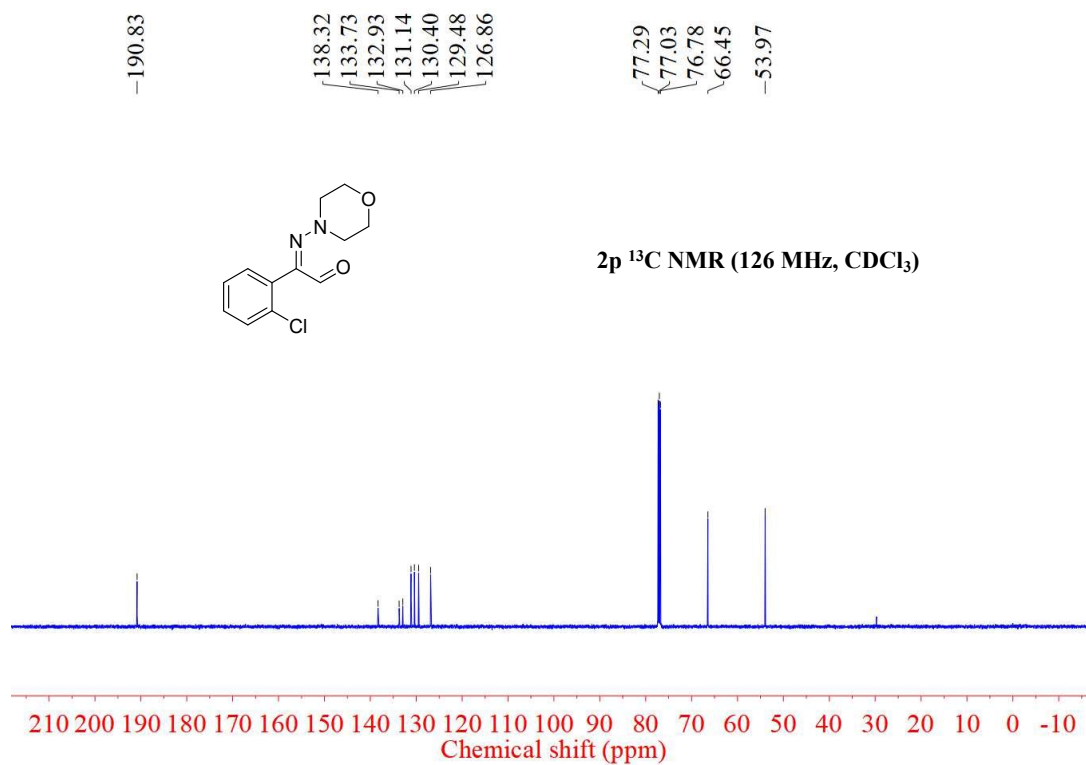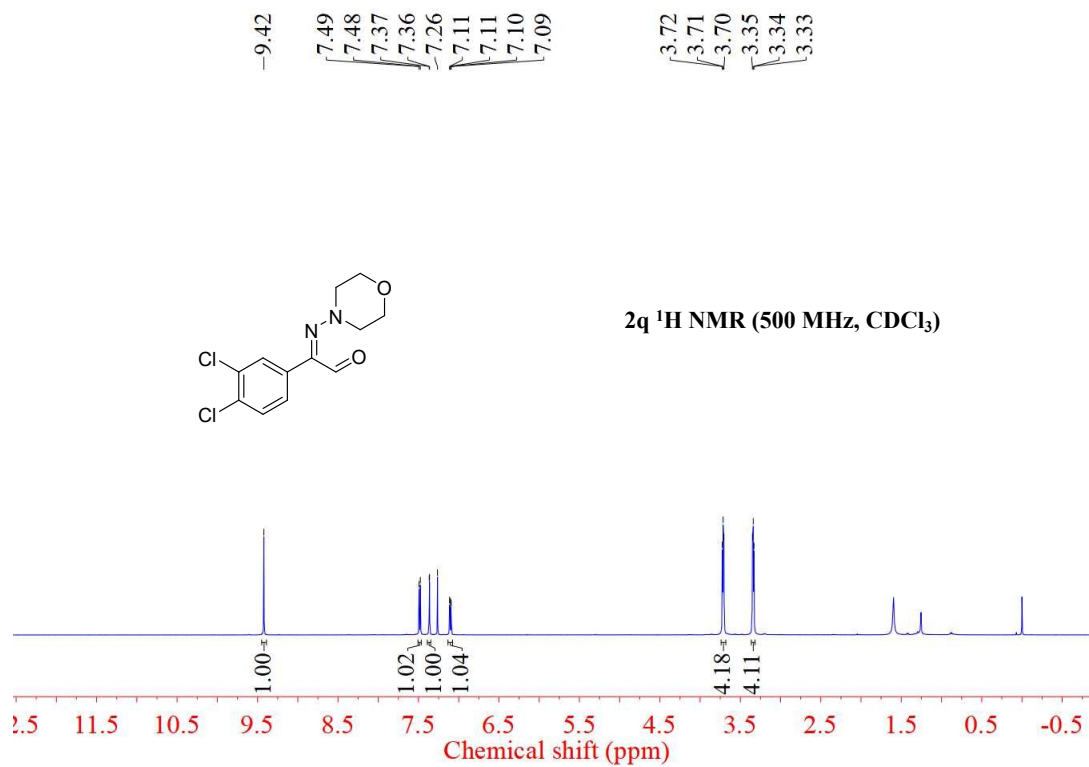

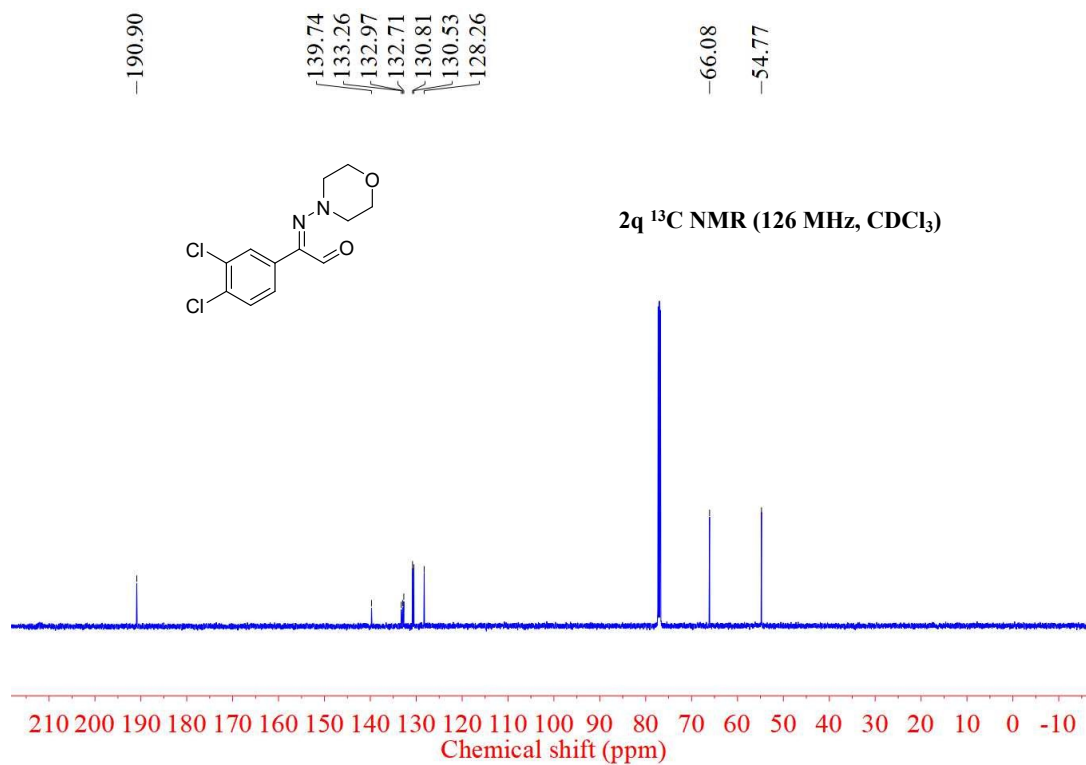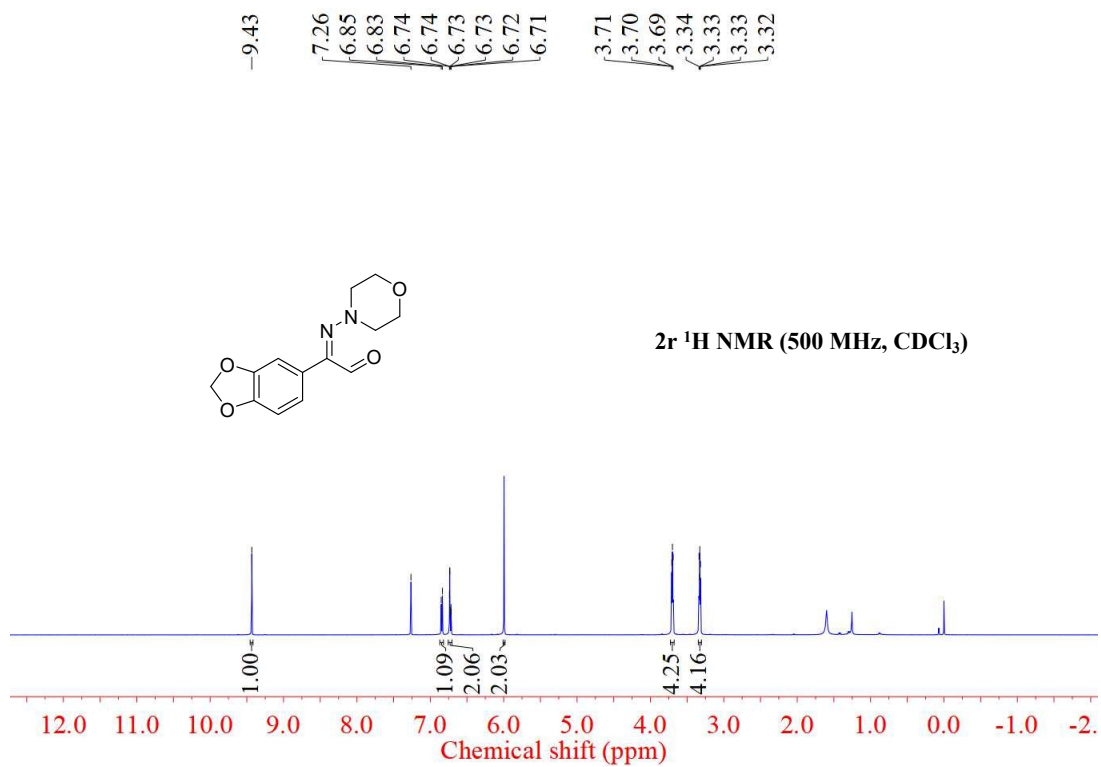

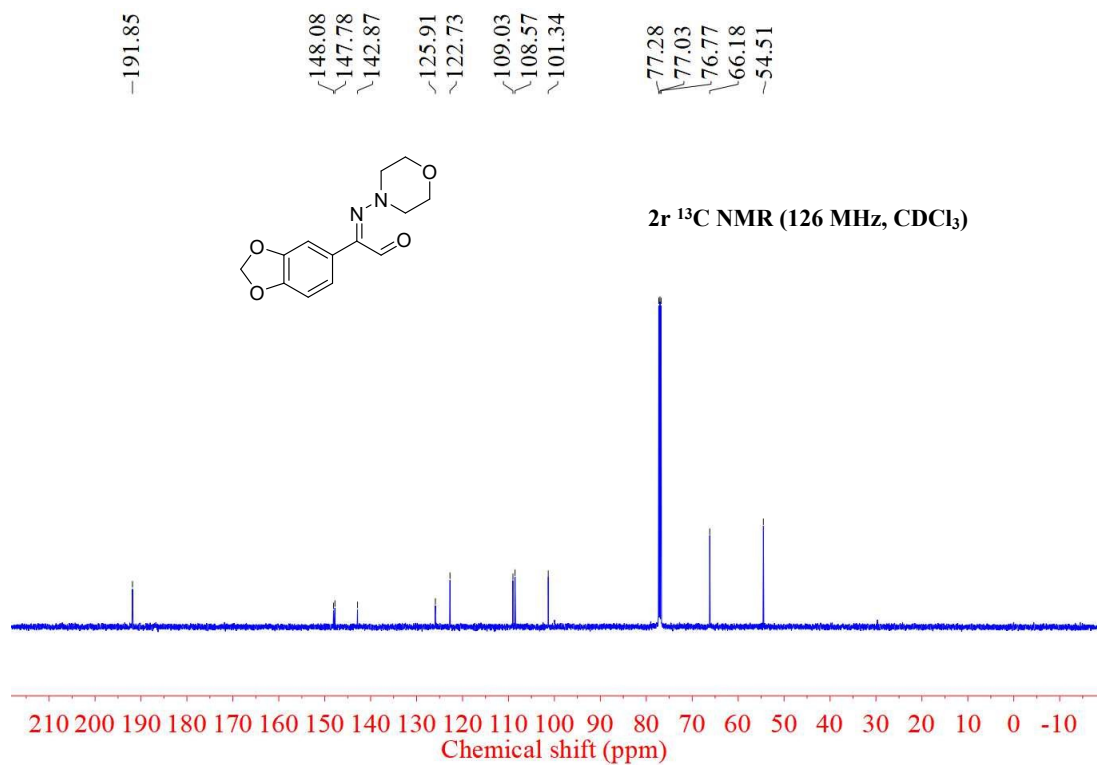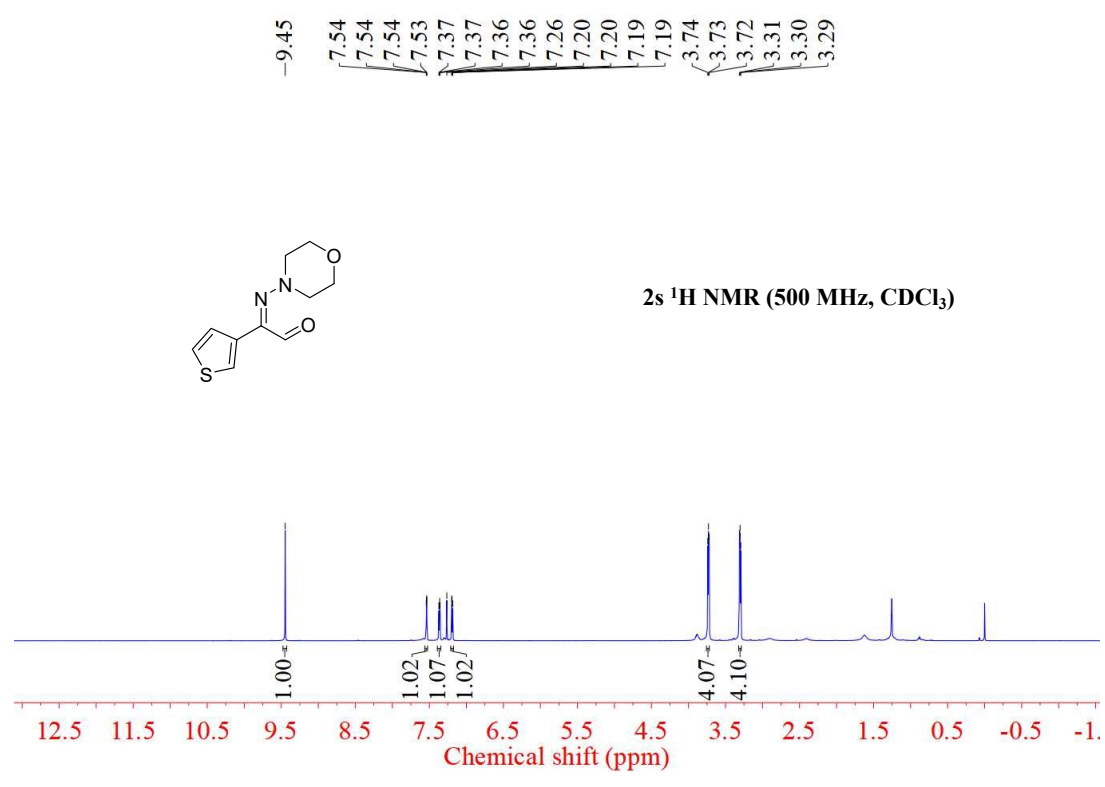



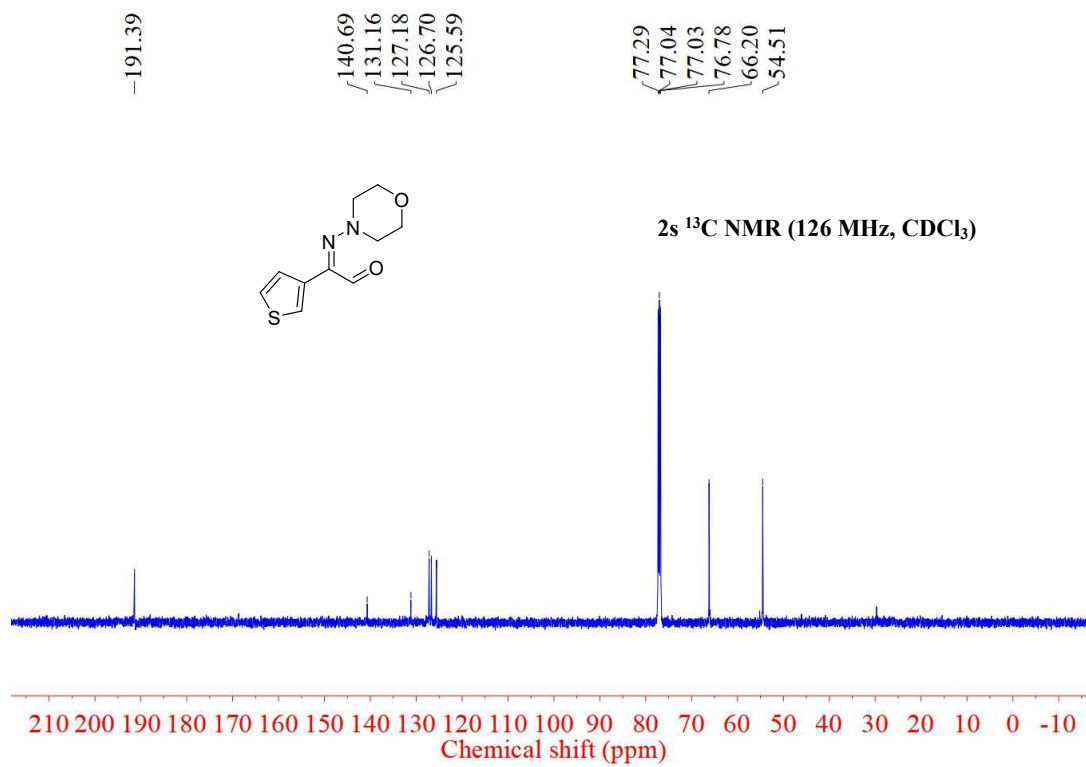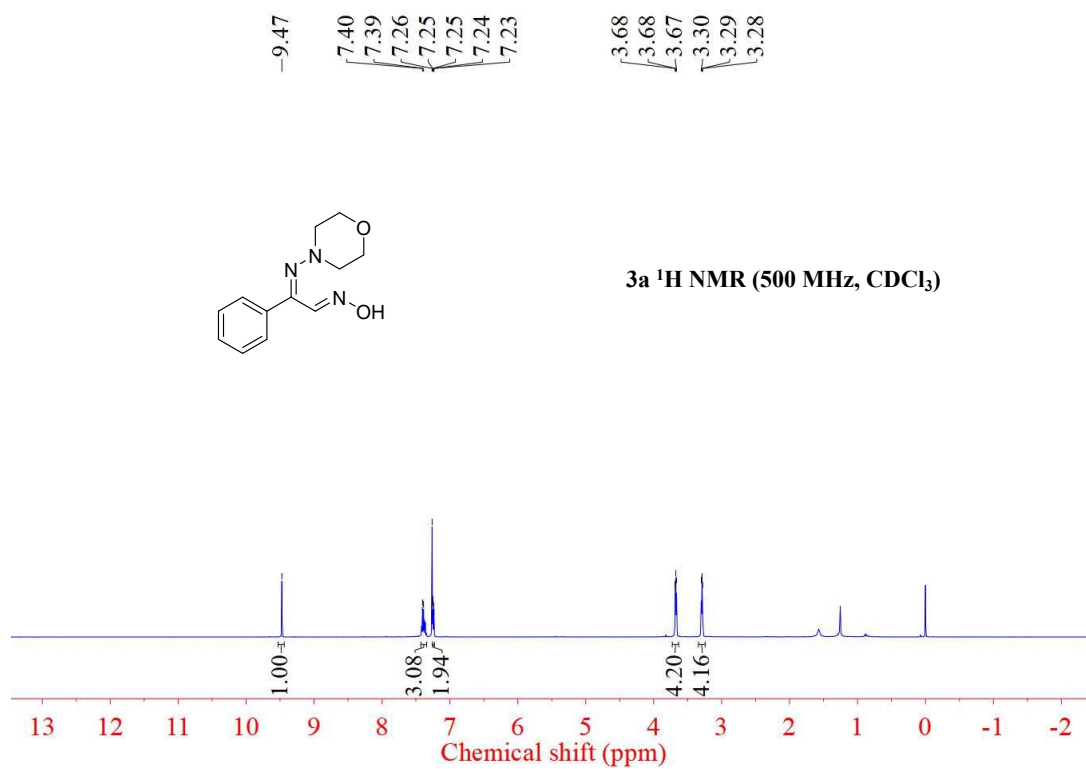

134.31  
128.93  
128.66  
124.91  
113.87  
113.61

77.30  
77.05  
76.79  
66.23  
-53.60

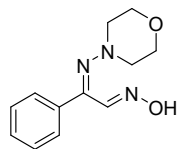

3a <sup>13</sup>C NMR (126 MHz, CDCl<sub>3</sub>)

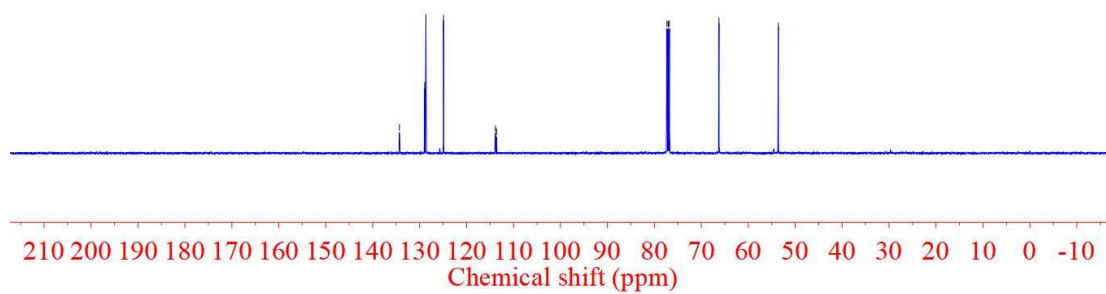

8.10  
8.10  
8.09  
8.09  
8.08  
8.08  
7.66  
7.65  
7.64  
7.64  
7.64  
7.63  
7.63  
7.62  
7.55  
7.54  
7.53  
7.52  
7.51  
6.80  
6.78  
5.74  
3.49  
2.52  
2.52  
2.52  
2.51  
2.51

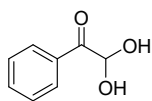

3b <sup>1</sup>H NMR (500 MHz, CDCl<sub>3</sub>)

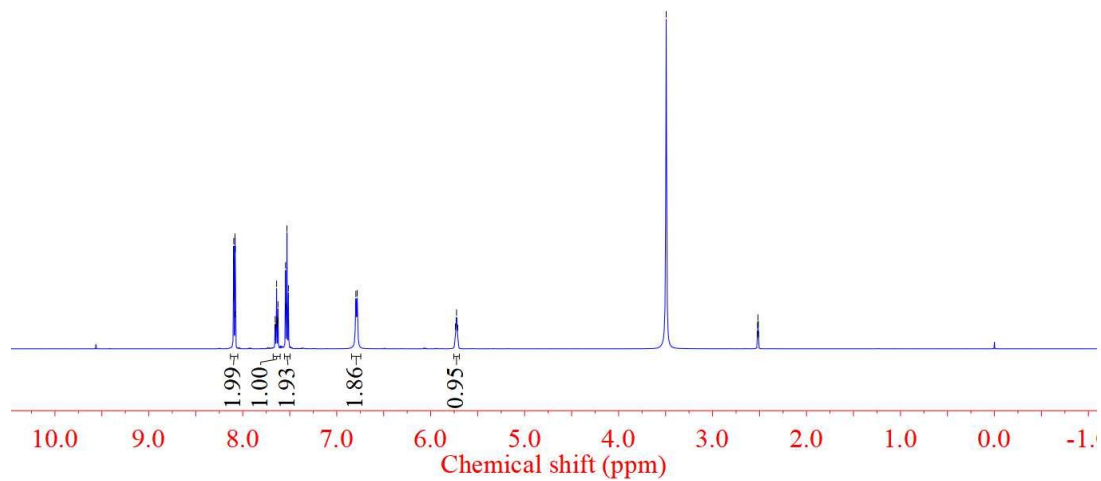

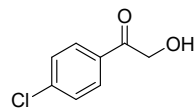

2w <sup>1</sup>H NMR (500 MHz, CDCl<sub>3</sub>)

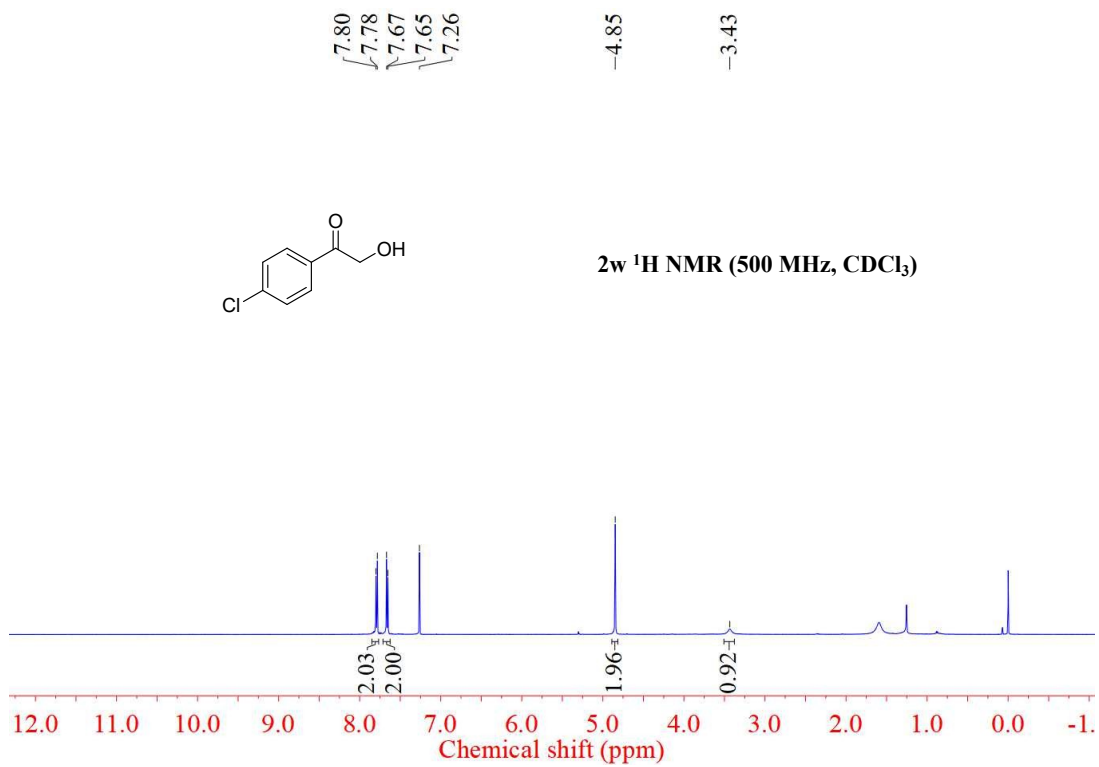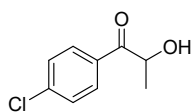

2x <sup>1</sup>H NMR (500 MHz, CDCl<sub>3</sub>)

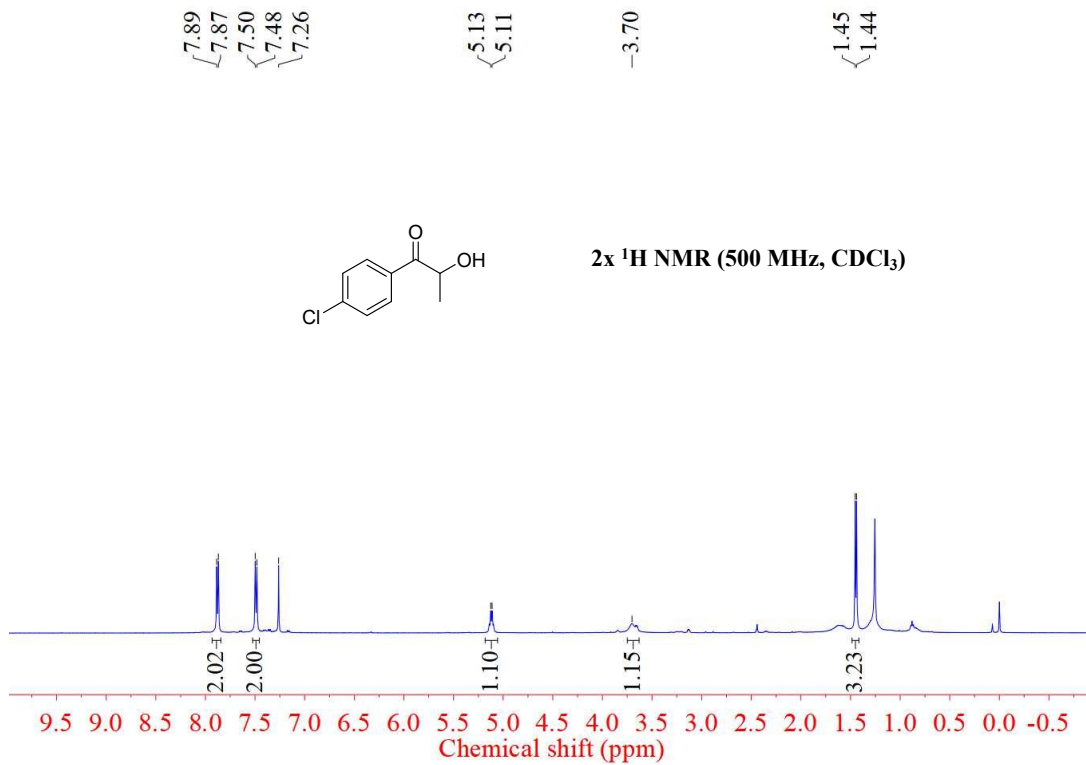

|               |                |             |       |                 |              |                        |                      |
|---------------|----------------|-------------|-------|-----------------|--------------|------------------------|----------------------|
| Sample Name   | SJB-018        | Position    | P1-B1 | Instrument Name | Instrument 1 | User Name              |                      |
| Inj Vol       | 5              | InjPosition |       | SampleType      | Sample       | IRM Calibration Status | Success              |
| Data Filename | SJB-018-0913.d | ACQ Method  | JYH.m | Comment         |              | Acquired Time          | 9/13/2021 6:50:11 PM |

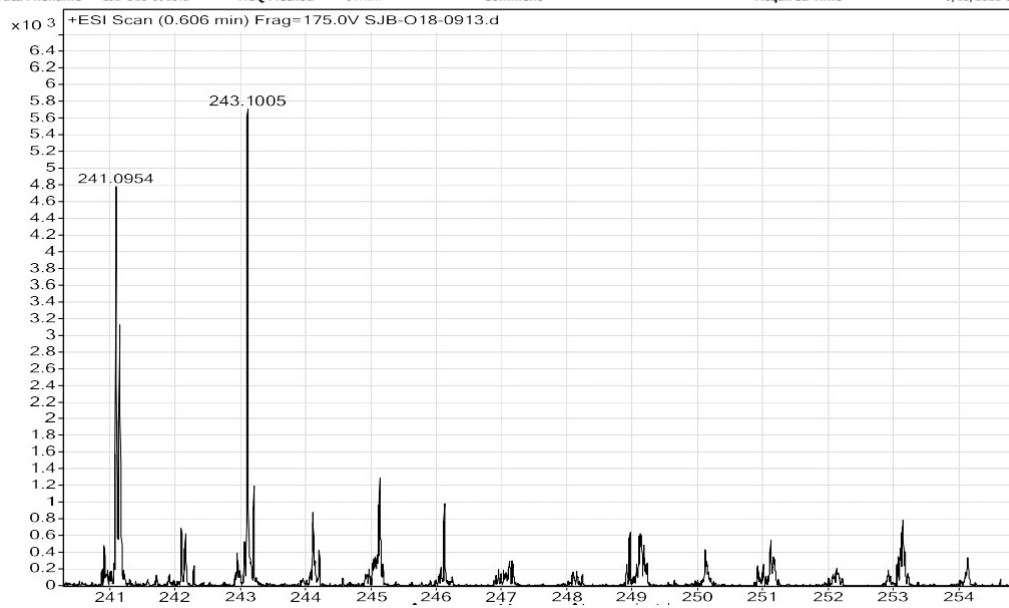

HRMS (ESI): [M+Na]<sup>+</sup> Calculated for C<sub>12</sub>H<sub>14</sub>N<sub>2</sub>O<sup>18</sup>ONa: 243.0995, Found 243.1005.
